1 **Extratubular polymerized uromodulin induces leukocyte recruitment and inflammation *in***  
2 ***vivo***

3  
4 Roland Immler<sup>1†</sup>, Bärbel Lange-Sperandio<sup>2†</sup>, Tobias Steffen<sup>1</sup>, Heike Beck<sup>1</sup>, Jonas Roth<sup>1</sup>, Georg  
5 Hupel<sup>1</sup>, Frederik Pfister<sup>3</sup>, Bastian Popper<sup>4</sup>, Bernd Uhl<sup>1,5</sup>, Hanna Mannell<sup>1</sup>, Christoph A.  
6 Reichel<sup>1,5</sup>, Volker Vielhauer<sup>6</sup>, Jürgen Scherberich<sup>7</sup>, Markus Sperandio<sup>1</sup> and Monika Pruenster<sup>1\*</sup>

7  
8 <sup>1</sup>Walter Brendel Centre of Experimental Medicine, Biomedical Center, Institute of Cardiovascular Physiology and  
9 Pathophysiology, Ludwig-Maximilians-University Munich, 82152 Planegg-Martinsried, Germany

10 <sup>2</sup>Department of Pediatrics, Dr. von Hauner Children's Hospital, University Hospital, Ludwig-Maximilians  
11 University, 80336 Munich, Germany

12 <sup>3</sup>Department of Nephropathology, Institute of Pathology, Friedrich-Alexander-University Erlangen-Nürnberg,  
13 91054 Erlangen, Germany

14 <sup>4</sup>Core facility animal models, Biomedical Center, Ludwig-Maximilians-University Munich, 82152 Planegg-  
15 Martinsried, Germany and Institute of Pathology, School of Medicine, Technical University of Munich, 81675  
16 Munich, Germany

17 <sup>5</sup>Department of Otorhinolaryngology, Ludwig-Maximilians-Universität München, D-81377 Munich, Germany

18 <sup>6</sup>Medizinische Klinik und Poliklinik IV, Nephrologisches Zentrum, University Hospital, Ludwig-Maximilians-  
19 University Munich, 80336 Munich, Germany

20 <sup>7</sup>Klinikum Harlaching, Lehrkrankenhaus der Ludwig-Maximilians University Munich, 81545 Munich, Germany

21  
22 †These authors contributed equally to this work

23  
24 **\*Corresponding author:**

25 Monika Pruenster, Dr.rer.nat.

26 Walter Brendel Center of Experimental Medicine

27 Institute of Cardiovasculare Physiology and Pathophysiology

28 Biomedizinisches Centrum München

29 Ludwig-Maximilians-Universität

30 Großhaderner Str. 9

31 82152 Planegg-Martinsried

32 GERMANY

33 voice: +49 (0)89 2180 71515

34 Fax: +49 (0)89 2180 71511

35 Email: [monika.pruenster@med.uni-muenchen.de](mailto:monika.pruenster@med.uni-muenchen.de)

36

37

38 **Conflict of interest statement:**

39 The authors have declared that no conflict of interest exists.

40

41 **ABSTRACT**

42 Uromodulin (UMOD) is produced and secreted by tubular epithelial cells. Secreted UMOD  
43 polymerizes (pUMOD) within the lumen, where it regulates salt transport and protects the  
44 kidney from bacteria and stone formation. Under various pathological conditions, pUMOD  
45 accumulates within the tubular lumen and reaches extratubular sites where it may interact  
46 with renal interstitial cells. Here, we investigated the potential of extratubular pUMOD to act  
47 as a damage associated molecular pattern (DAMP) molecule thereby creating local  
48 inflammation. We found that intrascrotal and intraperitoneal injection of pUMOD induced  
49 leukocyte recruitment *in vivo* and led to TNF- $\alpha$  secretion by F4/80 positive macrophages.  
50 Additionally, pUMOD directly affected vascular permeability and increased neutrophil  
51 extravasation independent of macrophage-released TNF- $\alpha$ . Interestingly, pUMOD did not  
52 directly upregulate adhesion molecules on endothelial cells and did not directly activate  $\beta$ 2  
53 integrins on neutrophils. In obstructed neonatal murine kidneys, we observed extratubular  
54 UMOD accumulation with tubular atrophy and leukocyte infiltrates. Finally, we found  
55 extratubular UMOD deposits associated with peritubular leukocyte infiltration in kidneys from  
56 patients with inflammatory kidney diseases. Taken together, we identified extratubular  
57 pUMOD as a strong inducer of leukocyte recruitment, underlining its critical role in mounting  
58 an inflammatory response in various kidneys pathologies.

59

## 60 INTRODUCTION

61 Uromodulin (UMOD), also known as Tamm-Horsfall protein (THP), is a glycoprotein with a  
62 molecular weight of 80-90kDa expressed by epithelial cells lining the thick ascending limb  
63 (TAL) of the loop of Henle and to minor degree the early distal convoluted tubules (1, 2). Under  
64 physiological conditions, the glycosylphosphatidylinositol (GPI) anchored protein is located on  
65 the apical plasma membrane (3), where it is released into the tubular lumen via conserved  
66 proteolytic cleavage (4). Cleaved UMOD polymerizes (pUMOD) and represents the most  
67 abundant urinary protein in healthy humans, with a secretion rate of 50-150mg/day (2).  
68 Within the lumen, pUMOD has numerous functions. It contributes to the water  
69 impermeability of the TAL and affects ion transport by binding to the Na<sup>+</sup>-K<sup>+</sup>-2Cl<sup>-</sup> cotransporter  
70 NKCC2 (5) and the potassium channel ROMK (6), hence regulating renal function and blood  
71 pressure (7). Furthermore, pUMOD blocks binding of *E.coli* to uroplakin on the urothelium (8)  
72 and protects from urinary tract infections (9, 10). The polymerized and negatively charged  
73 structure of the protein inhibits calcium crystal creation, prevents kidney stone formation (11,  
74 12) and regulates renal magnesium homeostasis (13). A smaller fraction of UMOD is also  
75 released basolaterally into the interstitium and a monomeric form of UMOD (mUMOD) is  
76 detectable in the serum (14). The function of serum mUMOD is still a matter of debate.  
77 Reduced serum levels correlate with higher cardiac mortality (15), elevated systemic ROS (16)  
78 and increased susceptibility to develop type 2 diabetes mellitus accompanied by reduced  
79 glucose metabolism (17). In addition, low serum levels were shown to be associated with  
80 reduced GFR (18), linking mUMOD serum levels to kidney function and survival. Abnormal  
81 distribution of UMOD, intracellular accumulation within the ER and the cytoplasm occurs in  
82 patients with autosomal dominant tubulointerstitial kidney disease (ADTKD) (19-22). ADTKDs  
83 are caused by mutations in the genes encoding for renin, mucin 1 or uromodulin (23, 24) and  
84 are characterized by tubulointerstitial fibrosis, tubular atrophy and chronic renal failure (22).  
85 In patients with multiple myeloma, pUMOD co-precipitates with monoclonal immunoglobulin  
86 free light chains and forms casts which block urinary flow and cause tubular atrophy resulting  
87 in progressive interstitial inflammation and fibrosis (25). Finally, in mouse models of unilateral  
88 ureteral obstruction (UUO) accompanied with an inflammatory response, pUMOD  
89 accumulation and extratubular deposition has been documented (26, 27). These findings  
90 imply a potential proinflammatory role of pUMOD under pathological conditions. However,  
91 direct *in vivo* evidence to support this function is still missing. To clarify a putative

92 proinflammatory role of pUMOD and differentiate pUMOD effects from the  
93 immunomodulatory role already described for mUMOD, we investigated leukocyte  
94 recruitment in mouse models for microvascular inflammation. We performed intravital  
95 microscopy in the cremaster muscle and found a marked induction of leukocyte adhesion and  
96 extravasation following intrascrotal injection of pUMOD. Intraperitoneal application of  
97 pUMOD induced recruitment of neutrophils and inflammatory monocytes as determined by  
98 flow cytometry. We also identified an upregulation and abnormal localization of UMOD  
99 accompanied by leukocyte infiltration in a mouse model of neonatal obstructive nephropathy  
100 and in renal biopsies from patients with various chronic renal inflammatory disorders. Taken  
101 together, our study expands the current knowledge of the broad spectrum of UMOD  
102 functions, proposing a proinflammatory and damage associated molecular pattern (DAMP)-  
103 like role of extratubular pUMOD in kidney pathologies.

## 104 RESULTS

### 105 pUMOD induces leukocyte recruitment in murine microvascular inflammation models

106 To study potential proinflammatory properties of pUMOD (for the polymerized structure see  
107 **Supplemental Figure 1A**) and its role in leukocyte recruitment *in vivo*, we applied an intravital  
108 microscopy model of acute microvascular inflammation in the mouse cremaster muscle. We  
109 injected pUMOD isolated from human urine into the scrotum (i.s.) of WT mice. Two hours  
110 after pUMOD injection, we exteriorized the cremaster muscle and assessed leukocyte rolling  
111 flux fraction, number of adherent leukocytes, and leukocyte rolling velocities in postcapillary  
112 cremaster muscle venules (28). Application of pUMOD led to a decrease in leukocyte rolling  
113 flux fraction and an increase in the number of adherent leukocytes/mm<sup>2</sup> compared to i.s.  
114 injection of normal saline (control) or human albumin solution (hALB), indicating a  
115 proinflammatory role of injected pUMOD (**Figure 1A, 1B and Supplemental Movie 1 and 2**).  
116 Of note, hemodynamic parameters (vessel diameter, blood flow velocity, shear rate, and  
117 systemic white blood cell count) did not differ between the groups (**Supplemental Table 1**).  
118 Further, administration of pUMOD reduced rolling velocities compared to injection of normal  
119 saline (**Figure 1C**), corroborating the assumed induction of inflammation by pUMOD. Severe  
120 local inflammation goes along with an upregulation of E-selectin on the affected vascular  
121 endothelium (29). To functionally test for E-selectin expression on the inflamed endothelium,  
122 we applied an E-selectin blocking antibody, which significantly increased leukocyte rolling  
123 velocity in pUMOD treated mice (**Figure 1C**) demonstrating endothelial expression of E-  
124 selectin.

125 Next, we aimed to study the effect of pUMOD on leukocyte extravasation. To do this, we  
126 injected pUMOD into the scrotum of WT mice. Two hours after injection, we removed and  
127 fixed the cremaster muscles before staining the tissue with Giemsa (**Figure 1D**) in order to  
128 analyze the number of perivascular neutrophils, eosinophils, and monocytes. In contrast to  
129 normal saline injection, pUMOD application induced extravasation of neutrophils within 2h  
130 (**Figure 1E**). Neutrophils are the first cells reaching sites of inflammation, while monocytes  
131 accumulate at later time points and persist longer. In order to test the putative capability of  
132 pUMOD to induce monocyte recruitment as well, we applied pUMOD into the peritoneum of  
133 WT mice and assessed leukocyte recruitment 6h after injection of pUMOD (**Figure 1F**). While  
134 application of normal saline did not induce any leukocyte extravasation, intraperitoneal

135 stimulation with pUMOD led to substantial recruitment of neutrophils and monocytes into the  
136 inflamed peritoneal cavity.

137 To demonstrate that murine polymerized UMOD (murine pUMOD) is also able to induce  
138 inflammation in the mouse cremaster muscle, we additionally injected a recombinant form of  
139 the mouse protein *i.s.* This truncated form of murine UMOD (aa25-588) contains all important  
140 domains of UMOD (30) and also forms polymers (**Supplemental Figure 1B**). Similar to our  
141 findings with human pUMOD, murine pUMOD reduced leukocyte rolling flux fraction and  
142 increased the number of adherent cells (**Supplemental Figure 2A and B**) compared to the  
143 injection of mouse albumin (mALB). Rolling velocities of leukocytes were similar in mice  
144 treated with pUMOD and murine pUMOD (**Supplemental Figure 2C**). Again, hemodynamic  
145 parameters did not differ between the groups (**Supplemental Table 2**). We also analyzed the  
146 effect of murine pUMOD on leukocyte extravasation. Similar to pUMOD, injection of murine  
147 pUMOD induced extravasation of primarily neutrophils (**Supplemental Figure 2D**). Taken  
148 together, these data clearly illustrate a proinflammatory function of pUMOD *in vivo*, affecting  
149 leukocyte rolling, leukocyte rolling velocity, leukocyte adhesion, and leukocyte extravasation.

150

### 151 **pUMOD does not directly induce adhesion molecule expression on endothelial cells or $\beta$ 2** 152 **integrin activation on neutrophils**

153 As pUMOD application into the scrotum of WT mice induced a strong inflammatory response  
154 with functional upregulation of E-selectin on the inflamed endothelium, we aimed to  
155 investigate whether pUMOD is able to directly induce upregulation of proinflammatory  
156 adhesion molecules on primary human umbilical vein endothelial cells (HUVECs) *in vitro*. For  
157 that purpose, we stimulated a monolayer of HUVECs with pUMOD, PBS, or TNF- $\alpha$  for six hours.  
158 Under control conditions (PBS), HUVECs did not constitutively express VCAM-1 and only small  
159 amounts of ICAM-1 and E-selectin, as indicated by FACS analysis (**Figure 2A-C**). TNF- $\alpha$   
160 stimulation in turn strongly upregulated surface levels of E-selectin, ICAM-1, and VCAM-1.  
161 Interestingly, pUMOD stimulation of HUVEC did not lead to the upregulation of non of the  
162 tested surface molecules suggesting that pUMOD does not directly affect expression levels of  
163 these rolling and adhesion related molecules on endothelial cells. This was surprising, as  
164 UMOD had been described to be a ligand for TLR4 (31). Stimulation of TLR4 through its ligand  
165 LPS is known to induce upregulation of E-selectin, ICAM-1, or VCAM-1 on the surface of  
166 HUVECs (32, 33) and  $\beta$ 2 integrin activation on neutrophils (34). Therefore, we also analyzed

167 potential effects of pUMOD on the activation status of  $\beta 2$  integrins on human and murine  
168 neutrophils. We used isolated human neutrophils from healthy donors and stimulated the  
169 cells with pUMOD, PMA, or PBS (control). The activation status of  $\beta 2$  integrins was analyzed  
170 by flow cytometry using the integrin activation-specific antibodies KIM127 and mAB24 (35).  
171 In contrast to PMA, pUMOD was not able to convert  $\beta 2$  integrins into its activated forms  
172 (**Figure 2D and 2E**). In addition, surface expression levels of Leukocyte function-associated  
173 antigen-1 (LFA-1) and total macrophage-1 antigen (Mac-1) were not affected by pUMOD  
174 (**Supplemental Figure 3**) suggesting that pUMOD does not directly stimulate  $\beta 2$  integrin  
175 activation. In a second set of experiments, bone marrow derived murine neutrophils were  
176 stimulated with pUMOD or recombinant mouse CXCL1 to induce GPCR mediated integrin  
177 activation. In line with the finding in human neutrophils, pUMOD stimulation did not activate  
178  $\beta 2$  integrins on murine neutrophils while CXCL1 treated cells showed increased binding of  
179 recombinant murine ICAM-1 illustrating  $\beta 2$  integrin activation (**Figure 2F**). These *in vitro*  
180 findings indicate that pUMOD does not directly induce the expression of key adhesion  
181 molecules, neither on endothelial cells nor on neutrophils, but rather exerts its  
182 proinflammatory effects through indirect mechanisms. In addition, the experiments also  
183 exclude TLR4 as pUMOD receptor on endothelial cells and neutrophils, as previously  
184 suggested (31) in our experimental setting.

185

### 186 **pUMOD induces TNF- $\alpha$ expression of F4/80 positive macrophages in the cremaster muscle** 187 ***in vivo***

188 To further explore how pUMOD might mediate its proinflammatory effects as observed in our  
189 *in vivo* cremaster muscle model, we investigated the ability of pUMOD to induce TNF- $\alpha$  release  
190 by tissue macrophages. An earlier report has shown that UMOD induced TNF- $\alpha$  secretion in  
191 human monocytes (36) and dendritic cells (31) and in bone marrow derived murine monocytes  
192 *in vitro* (31). Furthermore, intravenous administration of UMOD resulted in high serum TNF- $\alpha$   
193 levels in WT mice (31). To test for pUMOD induced TNF- $\alpha$  release, we injected pUMOD or LPS  
194 into the scrotum of WT mice. Two hours later, we dissected and cryo-conserved cremaster  
195 muscles and stained 10 $\mu$ m thick frozen slices with an antibody against murine TNF- $\alpha$ . pUMOD  
196 as well as LPS strongly induced TNF- $\alpha$  expression compared to normal saline injection (control)  
197 (**Figure 3A**). To define the cellular source of TNF- $\alpha$  production, we used antibodies against  
198 F4/80 and Ly6G. Application of pUMOD strongly induced TNF- $\alpha$  expression in F4/80 positive

199 macrophages (**Figure 3B**), whereas it was completely absent in Ly6G expressing neutrophils  
200 (**Figure 3C**). These findings demonstrate that pUMOD stimulates F4/80 positive macrophages  
201 to produce TNF- $\alpha$ , thereby triggering inflammation and leukocyte recruitment.

202

### 203 **Intrascrotal pUMOD application potentiates the effects of TNF- $\alpha$ in the acute inflammation** 204 **model of the mouse cremaster muscle *in vivo***

205 To elucidate whether pUMOD affects leukocyte recruitment exclusively by activating TNF- $\alpha$   
206 production in F4/80 positive macrophages or whether it may have additional, TNF- $\alpha$   
207 independent effects on leukocyte recruitment, we injected recombinant murine TNF- $\alpha$  alone  
208 or in combination with pUMOD into the scrotum of WT mice and analyzed leukocyte  
209 recruitment two hours after onset of inflammation. pUMOD did not alter TNF- $\alpha$  induced  
210 leukocyte rolling, leukocyte adhesion and leukocyte rolling velocities in postcapillary venules  
211 of the mouse cremaster (**Figure 4A-C**). Surprisingly, pUMOD potentiated the effect of TNF- $\alpha$   
212 on leukocyte extravasation. The number of extravasated neutrophils as analyzed in cremaster  
213 muscle whole mounts was significantly increased when pUMOD was applied concomitantly  
214 with TNF- $\alpha$  compared to TNF- $\alpha$  application alone (**Figure 4D and 4E**). Of note, hemodynamic  
215 parameters did not differ between the groups (**Supplemental Table 3**). These experiments  
216 suggest a role for pUMOD in the promotion of neutrophil extravasation *in vivo* independent  
217 of the effects triggered by TNF- $\alpha$ .

218

### 219 **pUMOD facilitates neutrophil transmigration across a HUVEC monolayer and increases** 220 **vascular permeability *in vitro* and *in vivo***

221 To elucidate a potential direct influence of pUMOD on neutrophil transmigration, which is  
222 independent of its effect on F4/80 positive macrophages in more detail, we allowed HUVECs  
223 to grow to confluence on transwell filters and stimulated the monolayer with pUMOD or PBS  
224 (control) for five hours. Afterwards we allowed isolated human neutrophils to transmigrate  
225 through the monolayers in absence (w/o) or presence of CXCL8 in the lower compartment of  
226 the transwell system. As expected, CXCL8 induced efficient neutrophil transmigration  
227 compared to w/o control (**Figure 5A**). Interestingly, pre-stimulation of the monolayer with  
228 pUMOD facilitated neutrophil transmigration with or without CXCL8, demonstrating a direct  
229 effect of pUMOD on transendothelial migration of neutrophils and therefore on neutrophil  
230 diapedesis and extravasation. Next, we tested the effect of pUMOD on vascular permeability



231 of endothelial cells by measuring the electrical impedance over a HUVEC monolayer. Both,  
232 pUMOD and TNF- $\alpha$  significantly decreased electrical impedance of HUVEC monolayers  
233 compared to control (**Figure 5B**). Interestingly, concomitant application of pUMOD and TNF-  
234  $\alpha$  did not further reduce electrical impedance of the monolayer. These results demonstrate  
235 that pUMOD increases vascular permeability of endothelial cells similarly to TNF- $\alpha$ . Finally, we  
236 wanted to confirm pUMOD-induced changes in vascular permeability *in vivo*. For this  
237 approach, we injected pUMOD into the scrotum of WT mice. Two hours later, we prepared  
238 the mouse cremaster muscle for intravital imaging, injected FITC-dextran through the carotid  
239 artery catheter and observed changes in fluorescence intensity in the tissue surrounding  
240 cremaster muscle postcapillary venules over time. In line with the *in vitro* findings, i.s. injection  
241 of pUMOD resulted in a significant increase of vascular permeability *in vivo* compared to  
242 injection of normal saline (control) (**Figure 5C and 5D**). Taken together, these results clearly  
243 show a direct proinflammatory function of pUMOD on the vasculature by increasing vascular  
244 permeability and promoting neutrophil transmigration *in vitro* and *in vivo*.

245

#### 246 **Neonatal obstructive nephropathy induces intra- and extratubular UMOD accumulation** 247 **accompanied by tubular atrophy and leukocyte infiltration**

248 As UMOD accumulation within renal tubules has been reported during normal neonatal  
249 development, we investigated UMOD expression in neonatal kidneys after unilateral ureteral  
250 obstruction (UUO) thereby linking a potential accumulation of UMOD at extratubular sites to  
251 leukocyte infiltration, which is commonly observed in neonatal UUO (37, 38). First, we  
252 performed Western Blot analysis in sham (control) and UUO operated neonatal kidneys.  
253 Expression levels of UMOD significantly increased after UUO compared to sham operated  
254 controls (**Figure 6A and 6B**). Immunohistochemical analysis displayed tubular dilatation and  
255 UMOD accumulation at intra- and extratubular sites of the dilated tubule, while controls  
256 displayed normal UMOD distribution exclusively insight the epithelium and the tubular lumen  
257 (**Figure 6C**). In addition, UUO led to a significant increase of tubular atrophy in proximal and  
258 distal tubules (**Figure 6D and 6E**) going along with infiltration of CD45<sup>+</sup>/CD11b<sup>+</sup> leukocytes  
259 (myeloid cells) as shown by FACS analysis (**Figure 6F**).

260

#### 261 **UMOD casts in patients suffering from monoclonal gammopathy with renal significance, IgA** 262 **nephropathy and interstitial nephritis co-localize with immune cell infiltrates**

263 Finally, we analyzed UMOD expression and localization in patients suffering from monoclonal  
264 gammopathy with renal significance, IgA nephropathy and interstitial nephritis. For this  
265 approach, we used human renal biopsies and stained tissue sections with PAS, CAE and a  
266 specific anti human UMOD antibody (**Figure 7**). We detected UMOD casts within the kidney,  
267 surrounded by infiltrates of neutrophils indicating a proinflammatory function of pUMOD if  
268 located outside the tubular lumen.

269 **DISCUSSION**

270 UMOD is a pleiotropic protein secreted by tubular epithelial cells of the thick ascending limb  
271 of the loop of Henle and to a lesser degree the early distal convoluted tubule. Here, we  
272 investigated a potential proinflammatory role of extratubular UMOD using pUMOD isolated  
273 from human urine. Stimulation of extrarenal tissue (mouse cremaster muscle and peritoneum  
274 as *in vivo* models of acute microvascular inflammation) with pUMOD *in vivo* led to a strong  
275 inflammatory response reflected by marked recruitment of neutrophils and inflammatory  
276 monocytes. Complemented with various additional *in vivo* and *in vitro* assays we demonstrate  
277 that pUMOD directly modulates the endothelial permeability and stimulates the generation  
278 of TNF- $\alpha$  from tissue macrophages. This in turn triggers the activation of vascular endothelial  
279 cells leading to the upregulation of adhesion molecules including E-selectin and the  
280 subsequent influx of neutrophils and inflammatory monocytes into the inflamed tissue.

281 Neutrophils and inflammatory monocytes belong to the innate immune system and are key  
282 players in the first line of defense against invading pathogens or during tissue damage. They  
283 exit the vasculature into inflamed tissue through a series of consecutive adhesion and  
284 activation steps (39). Several *in vitro* studies have predicted a role of UMOD on innate immune  
285 cell functions. UMOD was described to induce TNF- $\alpha$  secretion and tissue factor expression in  
286 human monocytes (36), to trigger dendritic cell maturation via TLR4 and NF- $\kappa$ B activation (31)  
287 and to activate respiratory burst, release of proteinases, degranulation and phagocytosis in  
288 neutrophils (40-42). Additionally, UMOD was reported to enhance CXCL8 expression, to  
289 dampen CD62L expression in human granulocytes (43) and to stimulate the NLRP3  
290 inflammasome in human monocytes, resulting in IL-1 $\beta$  release and cellular death (44). UMOD  
291 had also been reported to facilitate neutrophil transepithelial migration *in vitro* by using a  
292 stably transfected UMOD expressing epithelial cell line (45). Furthermore, a proinflammatory  
293 role of UMOD had also been described through the observation that intravenous  
294 administration of UMOD results in systemic inflammation (31). On the other hand, UMOD has  
295 been reported to limit inflammation by suppressing the production of proinflammatory  
296 cytokines and chemokines (46-48). Micanovic et al. found a negative regulatory role of UMOD  
297 on granulopoiesis and systemic neutrophil homeostasis (49). Interestingly, the same group  
298 described that proliferation and phagocytic activity of mononuclear phagocytes can be  
299 enhanced by UMOD while at the same time, loss of UMOD leads to an aggravated immune  
300 response in a renal ischemia-reperfusion injury model (14). Although these findings on the

301 role of UMOD during inflammation seem at least in part conflicting, Micanovic and colleagues  
302 provide an attractive explanation by proposing that UMOD functions can be assigned to two  
303 different forms of UMOD described *in vivo*, namely the monomeric and the polymeric form.  
304 Under homeostatic conditions, these two UMOD forms localize to two different body  
305 compartments after being released from tubular epithelial cells (2, 14, 30). The polymeric  
306 form is the predominant form found in the tubular lumen and urine, where it regulates water  
307 and electrolyte balance and protects the kidney from bacterial infections and kidney stone  
308 formation (2). Additionally, tubular epithelial cells release, although to a lesser extent, UMOD  
309 to the basolateral site into the renal parenchyma. Basolaterally released UMOD does not  
310 polymerize, but instead is transported into the bloodstream where it circulates primarily in its  
311 monomeric form and exerts its systemic homeostatic functions (14, 30). Therefore, under  
312 physiological conditions, the polymeric form is exclusively found in the urinary tract and is not  
313 exposed to tissues outside of the tubular lumen. Any contact of pUMOD with renal tissue  
314 outside the lumen only occurs under pathological conditions, i.e. in case the epithelial barrier  
315 with its tubular basement membrane is disrupted. Pathophysiological deposition of UMOD,  
316 so called cast nephropathy, is known for a long time as a common renal complication in the  
317 pathology of multiple myeloma, where free light chains present in the ultra-filtrate bind to  
318 UMOD and co-precipitate to form casts (50). These casts are supposed to induce tubular  
319 atrophy, progressive interstitial inflammation and fibrosis, resulting in renal complications,  
320 like acute kidney injury (25). We detected UMOD casts beyond their appearance in multiple  
321 myeloma, in patients suffering from monoclonal gammopathy of renal significance, IgA  
322 nephropathy and interstitial nephritis, where infiltrates of neutrophils surround UMOD casts  
323 in the kidney.

324 For this reason, we tested whether pUMOD functions as a DAMP-like molecule triggering  
325 inflammation if reaching renal tissue outside of the urinary tract. We show that extratubular  
326 pUMOD increases vascular permeability of endothelial cells, facilitates leukocyte  
327 extravasation and activates F4/80 positive macrophages to produce proinflammatory factors.  
328 However, it is currently unknown how pUMOD activates endothelial cells and innate immune  
329 cells, thereby mounting an immune response. Several UMOD receptors have been described  
330 including TLR4, Transient receptor potential melastatin 2 (TRPM2) and TRPM6 channels (13,  
331 16, 31). TRPM6 is neither expressed on endothelial cells nor on neutrophils, suggesting TLR4  
332 and TRPM2 as putative pUMOD interaction partners responsible for the described

333 proinflammatory effects. TLR4 ligation with LPS is known to upregulate E-selectin and ICAM-  
334 1 expression on HUVEC (32, 33). Using pUMOD as putative ligand for TLR4 on HUVEC, we were  
335 not able to induce upregulation of E-selectin, indicating that endothelial TLR4 is not a target  
336 of pUMOD in our experimental setting. Further support that pUMOD does not functionally  
337 engage TLR4 can be deduced from our *in vitro* experiments on isolated neutrophils where we  
338 showed that pUMOD stimulation of neutrophils did not activate  $\beta$ 2 integrins on the neutrophil  
339 surface. In contrast, recent work from our group demonstrated that the TLR4 ligands LPS and  
340 S100A8/A9 induce activation of  $\beta$ 2 integrins in neutrophils (34). TRPM2, the other reported  
341 pUMOD receptor was shown to regulate endothelial barrier function (51). In addition, TRPM2  
342 is expressed on macrophages(52) and neutrophils (53). Therefore, it is tempting to speculate  
343 that TRPM2 may be involved in pUMOD-induced changes in endothelial barrier function,  
344 macrophage activation and neutrophil/monocyte recruitment as described here.  
345 Nevertheless, the precise underlining mechanism of how pUMOD modulates endothelial and  
346 innate immune cells on a molecular level and which receptor/receptors are involved is still  
347 unclear and needs further investigation.

348 UMOD is highly expressed in the developing kidney and urinary tract obstruction during  
349 kidney development leads to leukocyte recruitment, inflammation and interstitial fibrosis in  
350 the neonatal kidney (37, 54). Therefore, we investigated UMOD expression, localization and  
351 immune cell infiltration in a neonatal model of unilateral ureteral obstruction (UUO). We show  
352 that UUO increases UMOD expression that localizes within and outside the tubular lumen.  
353 UUO causes tubular cell death and tubular atrophy leading to changes in tubular basement  
354 membrane integrity, which might favor the leakage of pUMOD into extratubular renal  
355 parenchyma. We postulate that in neonatal UUO pUMOD reaches extratubular renal tissue  
356 and induces recruitment of innate immune cells and interstitial inflammation in the neonatal  
357 kidney with obstruction. Our findings are in line with observations showing that UMOD  
358 protein levels increased in kidneys of adult mice following UUO and uromodulin-deficiency  
359 reduced inflammation and kidney injury in this model (26). Interestingly, interstitial UMOD  
360 deposition could not be detected in substantial quantities within *Umod*<sup>+/+</sup> mice with UUO in  
361 their study. However, this does not exclude a proinflammatory role of extratubular pUMOD  
362 in this process. In fact, low quantities of extratubular pUMOD undetectable by  
363 immunohistology may be sufficient (and of critical importance) to activate endothelial cells

364 and tissue resident macrophages in order to mount an inflammatory response in case of lost  
365 urinary tract barrier integrity.

366 Taken together, we identified a strong proinflammatory function of extratubular pUMOD with  
367 the potential to induce TNF- $\alpha$  secretion from kidney-resident macrophages and to modify  
368 endothelial cell permeability, thereby promoting innate immune cell (myeloid cell)  
369 recruitment and enhancing inflammation. This might be a scenario during acute and chronic  
370 renal diseases where luminal pUMOD accumulation and rupture of the tubular basement  
371 membrane leads to pUMOD release into the extratubular renal parenchyma. Extratubular  
372 pUMOD might then provide an important local DAMP-like signal, which sets in motion an  
373 inflammatory response to repair damaged tissue and restore tissue homeostasis.

374

375 **METHODS**

376 ***Animals***

377 C57BL/6 wildtype (WT) mice were obtained from Janvier Labs (Saint Berthevin) or from  
378 Charles River Laboratories (Sulzfeld). All mice were maintained at the Walter Brendel Centre  
379 of Experimental Medicine, LMU, Munich, or at the core facility animal models at the  
380 Biomedical Center, LMU, Planegg-Martinsried, Germany and at the zentrale  
381 Versuchstierhaltung Innenstadt (ZVH), LMU Munich, Germany. 8-25 weeks old male and  
382 female mice were used for all experiments. Neonatal C57BL/6 wildtype (WT) mice were used  
383 for unilateral ureteral obstruction experiments.

384

385 ***Antibodies***

386 To block E-selectin dependent leukocyte rolling *in vivo*, mice were injected with rat anti mouse  
387 E-selectin antibody (clone 9A9, In Vivo, 30µg/mouse). Following antibodies were used for  
388 UMOD Western blot: sheep anti mouse UMOD (R&D Systems, 1:1000), rabbit anti sheep IgG  
389 (Southern Biotech, 1:2000), for UMOD immunohistochemistry in UO model: rat anti UMOD  
390 (R&D Systems, 1:100) and for UMOD immunohistochemistry of human patient samples:  
391 mouse anti human UMOD (kindly provided by Jürgen Scherberich(55), 1:800). CAE staining  
392 was used to determine granulocytes. Following antibodies were used for flow cytometry (all  
393 5µg/ml, except indicated differently): rat anti mouse CD45 (clone 30-F11, BioLegend), rat anti  
394 mouse CD11b (clone M1/70), rat anti mouse CD115 (clone AFS98, BioLegend), rat anti mouse  
395 Gr1 (clone RB6-8C5, BioLegend), mouse anti human CD66b (clone G10F5, BioLegend) and  
396 CD66abce (clone TET2, Miltenyi Biotec), mouse anti human CD15 (clone W6D3, BioLegend or  
397 clone VIMC6, Miltenyi Biotec), mouse anti human CD62E (clone HAE-1f, BioLegend), mouse  
398 anti human IgG<sub>1</sub> isotype control (MOPC-21, BioLegend), mouse anti human CD54 (clone HA58,  
399 BioLegend), mouse anti human IgG<sub>1</sub> isotype control (clone 11711, R&D Systems), mouse anti  
400 human CD106 (clone 4B2, R&D Systems), secondary goat anti mouse-PE (Pharmingen), mouse  
401 anti human CD18 high affinity confirmation (clone 24, Hycult Biotech, 10µg/ml), mouse anti  
402 human CD18 extended confirmation (clone KIM127, Invivo, 10µg/ml), mouse anti human  
403 CD11a (clone HI111, BioLegend, 10µg/ml), mouse anti human CD11b (clone ICRF44,  
404 BioLegend, 10µg/ml), mouse anti human IgG<sub>1</sub> isotype control (clone 11711, R&D Systems,  
405 10µg/ml), rat anti mouse Ly6G (clone 1A8, BioLegend), goat anti human Fcγ-biotin  
406 (eBioscience) and streptavidin-PerCP-Cy5.5 (BioLegend). For immunofluorescence, we used

407 the following antibodies: rat anti mouse F4/80 (Invitrogen, 1:200), rabbit anti TNF- $\alpha$  (abcam,  
408 1:400), and rat anti mouse Ly6G (clone 1A8, BioLegend, 1:100). As secondary antibodies we  
409 used: donkey anti rat Alexa 488 (Invitrogen, 1:400) and goat anti rat Alexa 546 (Invitrogen,  
410 1:400). DAPI (4,6-diamidino-2-phenylindole) was used as a nuclear counterstain.

411

#### 412 ***Transmission electron microscopy***

413 Transmission electron microscopy was performed as described previously (44). All samples  
414 were stored at 4 degrees until further processing. In brief, a 30 $\mu$ l drop of human or mouse  
415 uromodulin protein in dH<sub>2</sub>O was placed on a formvar-coated copper grid (Science Services)  
416 and fixed with 2,5% Glutaraldehyde (Science Services) for 1 minute, washed in dH<sub>2</sub>O for 1  
417 minute and stained with 0,5% UranylLess (Science Services) in dH<sub>2</sub>O for 1 minute and air dried.  
418 Imaging was carried out using the JEOL -1200 EXII transmission electron microscope (JEOL,  
419 Akishima) at 60 kV. Images were taken using a digital camera (KeenViewII; Olympus) and  
420 processed with the iTEM software package (anlySISFive; Olympus).

421

#### 422 ***Animal model of acute inflammation in the mouse cremaster muscle***

423 Intravital microscopy of the mouse cremaster muscle was performed as previously described  
424 (34). Briefly, WT mice received an intrascrotal (i.s.) injection of either polymerized UMOD  
425 (pUMOD, BBI Solutions), human serum albumin (hALB, Sigma-Aldrich), murine recombinant  
426 polymerized UMOD (murine pUMOD, LSBio), murine serum albumin (murine ALB, Sigma-  
427 Aldrich) (all 10 $\mu$ g/mouse in 200 $\mu$ l 0.9%NaCl) or vehicle (control; 0.9% NaCl). The concentration  
428 used for pUMOD were chosen in accordance to previous studies (31). We also tested for  
429 potential LPS contamination of pUMOD and found no indication of TLR4 activation in  
430 functional assays (Figure 2A-F). In a second set of experiments, WT mice received an i.s.  
431 injection of recombinant murine (rm)TNF- $\alpha$  (R&D Systems, 500ng/mouse) or a concomitant  
432 injection of rmTNF- $\alpha$  and pUMOD (10 $\mu$ g/mouse). Two hours after i.s. injection, mice were  
433 anesthetized and the carotid artery was cannulated for determination of the white blood cell  
434 count (ProCyte Dx; IDEXX Laboratories) and/or for the application of E-selectin-blocking  
435 antibodies (30 $\mu$ g/mouse). The cremaster muscle was dissected and intravital microscopy was  
436 carried out on an OlympusBX51 WI microscope, equipped with a 40x objective (Olympus,  
437 0.8NA, water immersion objective) and a CCD camera (Kappa CF 8 HS). During the experiment,  
438 the muscle was constantly superfused with thermo-controlled bicarbonate buffer and



439 postcapillary venules were recorded using VirtualDub software for later off-line analysis.  
440 Centerline velocity of each venule was measured with a dual photodiode (Circusoft  
441 Instrumentation). Rolling flux fraction (number of rolling cells normalized to complete  
442 leukocyte flux (28)), number of adherent cells/mm<sup>2</sup>, leukocyte rolling velocities, vessel  
443 diameter and vessel length was determined on the basis of the generated movies using Fiji  
444 software (56). In another set of experiments, cremaster muscles were removed, fixed with  
445 paraformaldehyde (4% w/v (Applichem) in phosphate-buffered solution (PBS)) and used for  
446 Giemsa-staining (Merck) to calculate the number of perivascular neutrophils, eosinophils and  
447 monocytes. The analysis of perivascular leukocytes was carried out at the core facility  
448 BiImaging of the Biomedical Center with a Leica DM2500 microscope, equipped with a 100x  
449 objective (Leica, 1.4NA, oil immersion) and a Leica DMC2900 CMOS camera. In an additional  
450 set of experiments, cremaster muscles were removed, frozen in OCT embedding medium  
451 (Sakura Finetec) and stored at -80°C until further processing. Embedded frozen tissues were  
452 sectioned at 10µm with a Leica cryostat and fixed with ice-cold acetone for 10 minutes.  
453 Sections were used for an antigen-specific antibody staining procedure. For *in vivo* analysis of  
454 endothelial permeability, mice received an i.s. injection of pUMOD (10µg/mouse) or vehicle  
455 (control; 0.9% NaCl). Two hours later, mice were anesthetized and the carotid artery was  
456 cannulated for the application of fluorescein isothiocyanate (FITC)-dextran (Sigma-Aldrich,  
457 150kD) as described elsewhere (57). Briefly, 3 postcapillary venules and the surrounding tissue  
458 of the dissected mouse cremaster muscle were recorded for 45 minutes with the help of an  
459 Axio Scope.A1 microscope, equipped with a 488nm LED light source (Colibri 2) a long pass  
460 emission filter (LP 515), a 20x water immersion objective 0.5NA and a AxioCam Hsm digital  
461 camera (Zeiss MicroImaging). Mean fluorescence intensities of 6 randomly chosen regions of  
462 interest (ROI, 50x50µm<sup>2</sup>) were analyzed using ImageJ. Each ROI was at least 50µm in distance  
463 from the respective vessel.

464

#### 465 ***Animal model of acute inflammation in the mouse peritoneum***

466 WT mice received an intraperitoneal (i.p.) injection of either pUMOD (10µg/mouse in 800µl  
467 0.9%NaCl) or vehicle (control; 0.9% NaCl). 6h later, peritoneal lavage was performed using 7ml  
468 ice-cold PBS. Cells were collected, stained and number of extravasated neutrophils and  
469 inflammatory monocytes were counted by flow cytometry (CytoFLEX, Beckman Coulter) using  
470 Flow-Count Fluorospheres (Beckman Coulter) and analyzed with FlowJo Analysis Software.

471 Neutrophils and inflammatory monocytes were defined as CD45<sup>+</sup>/CD11b<sup>+</sup>/Gr1<sup>+</sup>/CD115<sup>-</sup> and  
472 CD45<sup>+</sup>/CD11b<sup>+</sup>/Gr1<sup>+</sup>/CD115<sup>+</sup> cells, respectively.

473

#### 474 ***Immunofluorescence of the mouse cremaster muscle***

475 Immunofluorescence was carried out using 5µm thick cryosections of mouse cremaster  
476 muscles. Briefly, cryosections were washed thoroughly in PBS before and after each  
477 incubation step. Nonspecific binding sites were blocked by incubation in 20% normal goat  
478 serum (NGS) and 5% bovine serum albumin/PBS (BSA, Fraction V; both Sigma-Aldrich).  
479 Cryosections were stained with anti TNF-α, anti F4/80 and anti Ly6G antibodies, followed by  
480 secondary antibody staining. Sections were counterstained with DAPI and evaluated using  
481 confocal microscopy at the core facility bioimaging of the Biomedical Center with an inverted  
482 Leica SP8 microscope.

483

#### 484 ***Isolation and cell culture of HUVECs***

485 HUVECs were purchased from Promocell (HUVEC cryopreserved, pooled) or freshly isolated  
486 from the umbilical cord vein by collagenase A digestion (1mg/ml; Roche Diagnostics), as  
487 previously described (58). Cells were grown in Endothelial cell Growth Medium supplemented  
488 with SupplementMix (Promocell) and DMEM supplemented with 20% FCS and 1%  
489 penicillin/streptomycin (PAA Laboratories) in a 1:1 ratio in standard cell culture dishes. At  
490 confluence, cells were harvested using trypsin/EDTA (PAA Laboratories). Cells from passage II  
491 or III were used for further experiments.

492

#### 493 ***Transwell Migration Assay***

494 HUVECs were cultured on Transwell inserts (Falcon, 8µm pore size) to confluence. Confluent  
495 monolayers were stimulated with pUMOD (3µg/ml) or PBS (control) for 5h before being  
496 washed. Human neutrophils were isolated from healthy volunteer blood donors using  
497 Polymorphprep (AXI-SHIELD) as previously described (34). Isolated neutrophils were applied  
498 in the upper compartment of the Transwell system onto the HUVEC monolayer and allowed  
499 to migrate for 1h at 37°C in HBSS puffer containing 0.1% glucose, 1mM CaCl<sub>2</sub>, 1mM MgCl<sub>2</sub>,  
500 0.25% BSA and 10mM HEPES (Sigma-Aldrich), pH7.4. Recombinant CXCL8 (Peprotech,  
501 100ng/ml) was used as chemoattractant, HBSS puffer alone was used as negative control  
502 (w/o). Numbers of transmigrated neutrophils was counted by flow cytometry (Gallios,

503 Beckman Coulter) using Flow-Count Fluorospheres (Beckman Coulter) and analyzed with  
504 Kaluza Flow Analysis Software (Beckman Coulter). Neutrophils were defined as CD66b and  
505 CD15 double positive cells.

506

#### 507 ***Surface expression levels of E-selectin, ICAM-1, and VCAM-1 on HUVEC***

508 HUVECs (passage II or III) were cultured until confluence. Confluent monolayers were  
509 stimulated with pUMOD (3µg/ml), recombinant human TNF-α (rhTNF-α, Peprotech, 10ng/ml)  
510 or PBS (control) for 6h. Cells were washed, harvested and stained with anti E-selectin (CD62E),  
511 mouse anti human ICAM-1 (CD54) and mouse anti human VCAM-1 (CD106) antibodies and  
512 fixed with FACS lysing solution (BD Bioscience). Surface levels were determined by flow  
513 cytometry (Gallios, Beckman Coulter) and analyzed using Kaluza software (Beckman Coulter).

514

#### 515 ***mAb24 binding assay***

516 Human neutrophils were isolated from healthy volunteer blood donors using Polymorphprep  
517 and incubated with pUMOD (3µg/ml), PMA (Sigma-Aldrich, 1nM) or HBSS buffer (unstim.) in  
518 the presence of the anti-human β2 integrin activation antibody mAB24 or isotype control at  
519 37°C for 5 minutes. Stimulation was stopped by adding ice-cold FACS lysing solution (BD  
520 Bioscience). After fixation, cells were stained with secondary goat anti mouse antibody.  
521 Activation status of β2 integrins was determined by flow cytometry, human neutrophils were  
522 defined as CD66abce and CD15 double positive cells. In addition, total Mac-1 and total LFA-1  
523 surface protein levels were investigated. Therefore, activated neutrophils were stained with  
524 mouse anti-human CD11b or CD11a, followed by secondary antibody.

525

#### 526 ***ICAM-1 binding assay***

527 Soluble ICAM-1 binding assay was performed as described previously (59). Briefly, bone  
528 marrow-derived neutrophils from WT mice were enriched using a Percoll gradient (Sigma-  
529 Aldrich). Enriched neutrophils were stimulated with rmCXCL1 (100ng/ml, PeproTech), pUMOD  
530 (3µg/ml) or HBSS buffer (unstim.), in the presence of rmICAM-1 (hFc chimera, 20µg/ml, R&D  
531 Systems, pre-complexed with goat anti human Fcγ-biotin and streptavidin-PerCP-Cy5.5) for  
532 3 minutes at 37°C in HBSS buffer. Reaction was stopped by adding ice-cold FACS lysing  
533 solution. Cells were stained with rat anti mouse Ly6G antibody and the amount of bound  
534 soluble ICAM-1 was determined by flow cytometry.

535

536 ***Trans endothelial electrical resistance measurements (TEER)***

537 8 Well-Slides (8W10E, Applied BioPhysics) were coated with collagen type 1 (rat tail, Ibdidi) and  
538 HUVEC were seeded onto the slides. The slides were installed in the TEER measuring device  
539 (ECISz, Applied BioPhysics), which was positioned in an incubator with 5% CO<sub>2</sub> at 37°C. HUVECs  
540 (passage II) were cultured to confluence and stimulated with 3µg/ml pUMOD and/or 10ng/ml  
541 rhTNF-α at time point 0. PBS was used as negative control. Measurements were acquired  
542 continuously at 4000Hz (ECIS Software v1.2.156.0 PC, Applied BioPhysics) for 8h. Means of  
543 two technical replicates were calculated.

544

545 ***Animal model of unilateral ureteral obstruction***

546 Newborn WT mice were subjected to complete left ureteral obstruction (UUO) or sham  
547 operation under general anesthesia with isoflurane and oxygen at the second day of life as  
548 described before (37, 54, 60). After recovery, neonatal mice were returned to their mothers  
549 until sacrifice at day 3, 7, 14, or 21 of life. Kidneys were removed and either fixed in 4% PFA  
550 for immunostaining, directly used for FACS analysis or frozen in liquid nitrogen and stored at  
551 -80°C for further experiments.

552

553 ***Identification of UMOD***

554 UMOD localization in the neonatal kidney was examined by immunohistochemistry.  
555 Paraformaldehyde-fixed, paraffin-embedded kidney sections were subjected to antigen  
556 retrieval and incubated with an anti UMOD antibody, followed by a biotinylated goat anti rat  
557 IgG antibody. Specificity was assessed through simultaneous staining of control sections with  
558 an unspecific, species-controlled primary antibody. Sections were incubated with ABC  
559 reagent, detected with DAB (Vectastain, Vector Laboratories) and counterstained with  
560 methylene blue.

561

562 ***PAS staining of sham and UUO operated neonatal kidneys***

563 Kidney sections were stained with periodic acid Schiff (PAS) to investigate tubular atrophy in  
564 UUO and sham-operated mice as described previously (37, 54, 60). Alterations of the tubular  
565 basement membrane (TBM) were determined in 20 sequentially selected fields at x400  
566 magnification.

567

568 ***FACS staining of sham and UUO operated neonatal kidneys***

569 Preparation of renal single-cell suspensions was performed as described previously (61). The  
570 obtained cell suspension contained infiltrating leukocytes and intrinsic renal cells, the largest  
571 proportion being tubular epithelial cells. Infiltrating renal myeloid cells were quantified by  
572 flow cytometry (FACSCalibur) and analyzed as Cellquest software (BD Biosciences). Myeloid  
573 cells were defined as CD45<sup>+</sup>/CD11b<sup>+</sup> cells and expressed as percentage of total renal cells.

574

575 ***Western immunoblotting***

576 Neonatal kidneys from mice undergoing UUO surgery or sham operation collected at day 3, 7,  
577 14 and 21 of life were homogenized in protein lysis buffer (Tris 50 mM, 2% SDS, 1mM Na<sub>3</sub>VO<sub>4</sub>)  
578 containing proteinase inhibitors (Complete Mini, Roche Diagnostics) and benzonase  
579 (Novagen, Merck) and centrifuged for 10 minutes at 16,000 x g. Protein content was measured  
580 using a BCA kit (Thermo Scientific). 20µg of protein of each sample was separated on  
581 polyacrylamide gels at 160V for 80 minutes and blotted onto PVDF-membranes (Millipore,  
582 80mA/membrane, 90 minutes). After blocking for 2h in Tris-buffered saline with Tween-20  
583 containing 5% nonfat dry milk and/or BSA, blots were incubated with primary antibodies 2h  
584 at room temperature or at 4°C overnight. Blots were washed and incubated with horseradish  
585 peroxidase-conjugated secondary antibody for 1h at room temperature. Immune complexes  
586 were detected using enhanced chemiluminescence. Blots were exposed to X-ray films (Kodak),  
587 and protein bands were quantified using densitometry. Each band represents one single  
588 mouse kidney.

589

590 ***Immunohistochemistry of human kidney sections***

591 Sections of paraffin-embedded kidney biopsies (1-2µm) were stained with standard periodic  
592 acid Schiff reagent (PAS), chloroacetatesterase (CAE) or anti-human UMOD antibody.

593

594 ***Statistics***

595 Data are presented as mean±SEM, cumulative frequency or representative images as depicted  
596 in the figure legends. Group sizes were chosen based on previous experiments. GraphPad  
597 Prism 7 software (GraphPad Software Inc.) was used to analyze data and to illustrate graphs.  
598 Statistical tests were carried out according to the number of groups being compared. For

599 pairwise comparison, an unpaired student's t-test and for more than two experimental  
600 groups, either a one-way or a two-way analysis of variance (ANOVA) with either a Tukey's or  
601 a Sidak's *post-hoc* test was performed. P-values <0.05 were considered statistically significant  
602 and indicated as follows: \*: <0.05, \*\*: <0.01, \*\*\*: <0.005.

603

604 ***Study approval***

605 The government of Oberbayern, Germany, approved all animal experiments, AZ 55.2-1-54-  
606 2532-76-12-2012 and ROB55.2-2532.Vet\_02-17-102 and AZ 55.2-1-54-2532-118-11. Blood  
607 sampling from healthy volunteers was approved by the ethic committee from the LMU  
608 München (Az. 611-15).

609

610

611

612 **AUTHOR CONTRIBUTION**

613 RI and BL-S designed and conducted experiments, analyzed data and wrote the manuscript.

614 TS, HB, GH, FP, BP and BU acquired and analyzed data. HM, CAR, VV and JS provided their

615 expertise and critical reagents. MS and MP designed experiments and wrote the manuscript.

616

617 **ACKNOWLEDGMENTS**

618 We thank Olivier Devuyst for critical discussion. In addition, we thank Susanne Bierschenk,

619 Nadine Schmidt, Dorothee Gössel, and Ursula Keller for excellent technical assistance as well

620 as the core facility BioImaging at the Biomedical Center, LMU Planegg-Martinsried, Germany

621 for their help with microscopy.

622 This work was supported by the German Research Foundation (DFG) collaborative research

623 grant SFB914, projects B01 (MS), B03 (CAR), and B11 (MP), DFG La 1257/5-1 (BL-S) and by the

624 FöFoLe-Program of the Medical Faculty, LMU Munich (MP and MS).

625

626 REFERENCES

- 627 1. Pennica D, Kohr WJ, Kuang WJ, Glaister D, Aggarwal BB, Chen EY, et al.  
628 Identification of human uromodulin as the Tamm-Horsfall urinary glycoprotein.  
629 *Science*. 1987;236(4797):83-8.
- 630 2. Devuyst O, Olinger E, and Rampoldi L. Uromodulin: from physiology to rare and  
631 complex kidney disorders. *Nat Rev Nephrol*. 2017;13(9):525-44.
- 632 3. Rampoldi L, Scolari F, Amoroso A, Ghiggeri G, and Devuyst O. The rediscovery of  
633 uromodulin (Tamm-Horsfall protein): from tubulointerstitial nephropathy to chronic  
634 kidney disease. *Kidney Int*. 2011;80(4):338-47.
- 635 4. Santambrogio S, Cattaneo A, Bernascone I, Schwend T, Jovine L, Bachi A, et al.  
636 Urinary uromodulin carries an intact ZP domain generated by a conserved C-terminal  
637 proteolytic cleavage. *Biochem Biophys Res Commun*. 2008;370(3):410-3.
- 638 5. Mutig K, Kahl T, Saritas T, Godes M, Persson P, Bates J, et al. Activation of the  
639 bumetanide-sensitive Na<sup>+</sup>,K<sup>+</sup>,2Cl<sup>-</sup> cotransporter (NKCC2) is facilitated by Tamm-  
640 Horsfall protein in a chloride-sensitive manner. *J Biol Chem*. 2011;286(34):30200-10.
- 641 6. Renigunta A, Renigunta V, Saritas T, Decher N, Mutig K, and Waldegger S. Tamm-  
642 Horsfall glycoprotein interacts with renal outer medullary potassium channel ROMK2  
643 and regulates its function. *J Biol Chem*. 2011;286(3):2224-35.
- 644 7. Trudu M, Janas S, Lanzani C, Debaix H, Schaeffer C, Ikehata M, et al. Common  
645 noncoding UMOD gene variants induce salt-sensitive hypertension and kidney  
646 damage by increasing uromodulin expression. *Nat Med*. 2013;19(12):1655-60.
- 647 8. Pak J, Pu Y, Zhang ZT, Hasty DL, and Wu XR. Tamm-Horsfall protein binds to type  
648 1 fimbriated *Escherichia coli* and prevents *E. coli* from binding to uroplakin Ia and Ib  
649 receptors. *J Biol Chem*. 2001;276(13):9924-30.
- 650 9. Serafini-Cessi F, Monti A, and Cavallone D. N-Glycans carried by Tamm-Horsfall  
651 glycoprotein have a crucial role in the defense against urinary tract diseases.  
652 *Glycoconj J*. 2005;22(7-9):383-94.
- 653 10. Mo L, Zhu XH, Huang HY, Shapiro E, Hasty DL, and Wu XR. Ablation of the  
654 Tamm-Horsfall protein gene increases susceptibility of mice to bladder colonization  
655 by type 1-fimbriated *Escherichia coli*. *Am J Physiol Renal Physiol*. 2004;286(4):F795-  
656 802.
- 657 11. Mo L, Huang HY, Zhu XH, Shapiro E, Hasty DL, and Wu XR. Tamm-Horsfall  
658 protein is a critical renal defense factor protecting against calcium oxalate crystal  
659 formation. *Kidney Int*. 2004;66(3):1159-66.
- 660 12. Liu Y, Mo L, Goldfarb DS, Evan AP, Liang F, Khan SR, et al. Progressive renal  
661 papillary calcification and ureteral stone formation in mice deficient for Tamm-  
662 Horsfall protein. *Am J Physiol Renal Physiol*. 2010;299(3):F469-78.
- 663 13. Nie M, Bal MS, Liu J, Yang Z, Rivera C, Wu XR, et al. Uromodulin regulates renal  
664 magnesium homeostasis through the ion channel transient receptor potential  
665 melastatin 6 (TRPM6). *J Biol Chem*. 2018;293(42):16488-502.
- 666 14. Micanovic R, Khan S, Janosevic D, Lee ME, Hato T, Srour EF, et al. Tamm-Horsfall  
667 Protein Regulates Mononuclear Phagocytes in the Kidney. *J Am Soc Nephrol*.  
668 2018;29(3):841-56.
- 669 15. Delgado GE, Kleber ME, Scharnagl H, Kramer BK, Marz W, and Scherberich JE.  
670 Serum Uromodulin and Mortality Risk in Patients Undergoing Coronary  
671 Angiography. *J Am Soc Nephrol*. 2017;28(7):2201-10.
- 672 16. LaFavers KA, Macedo E, Garimella PS, Lima C, Khan S, Myslinski J, et al.  
673 Circulating uromodulin inhibits systemic oxidative stress by inactivating the TRPM2  
674 channel. *Sci Transl Med*. 2019;11(512).



- 675 17. Leihener A, Muendlein A, Saely CH, Kinz E, Brandtner EM, Fraunberger P, et al.  
676 Serum uromodulin is associated with impaired glucose metabolism. *Medicine*  
677 (*Baltimore*). 2017;96(5):e5798.
- 678 18. Kraus D, and Wanner C. Uromodulin in the Bloodstream: Old Wine in a New  
679 Wineskin. *J Am Soc Nephrol*. 2017;28(7):1955-7.
- 680 19. Rampoldi L, Caridi G, Santon D, Boaretto F, Bernascone I, Lamorte G, et al. Allelism  
681 of MCKD, FJHN and GCKD caused by impairment of uromodulin export dynamics.  
682 *Hum Mol Genet*. 2003;12(24):3369-84.
- 683 20. Reindl J, Grone HJ, Wolf G, and Busch M. Uromodulin-related autosomal-dominant  
684 tubulointerstitial kidney disease-pathogenetic insights based on a case. *Clin Kidney J*.  
685 2019;12(2):172-9.
- 686 21. Jennings P, Aydin S, Kotanko P, Lechner J, Lhotta K, Williams S, et al. Membrane  
687 targeting and secretion of mutant uromodulin in familial juvenile hyperuricemic  
688 nephropathy. *J Am Soc Nephrol*. 2007;18(1):264-73.
- 689 22. Eckardt KU, Alper SL, Antignac C, Bleyer AJ, Chauveau D, Dahan K, et al.  
690 Autosomal dominant tubulointerstitial kidney disease: diagnosis, classification, and  
691 management--A KDIGO consensus report. *Kidney Int*. 2015;88(4):676-83.
- 692 23. Ekici AB, Hackenbeck T, Moriniere V, Pannes A, Buettner M, Uebe S, et al. Renal  
693 fibrosis is the common feature of autosomal dominant tubulointerstitial kidney  
694 diseases caused by mutations in mucin 1 or uromodulin. *Kidney Int*. 2014;86(3):589-  
695 99.
- 696 24. Bleyer AJ, Kidd K, Zivna M, and Kmoch S. Autosomal Dominant Tubulointerstitial  
697 Kidney Disease. *Adv Chronic Kidney Dis*. 2017;24(2):86-93.
- 698 25. Hutchison CA, Batuman V, Behrens J, Bridoux F, Sirac C, Dispenzieri A, et al. The  
699 pathogenesis and diagnosis of acute kidney injury in multiple myeloma. *Nat Rev*  
700 *Nephrol*. 2011;8(1):43-51.
- 701 26. Maydan O, McDade PG, Liu Y, Wu XR, Matsell DG, and Eddy AA. Uromodulin  
702 deficiency alters tubular injury and interstitial inflammation but not fibrosis in  
703 experimental obstructive nephropathy. *Physiol Rep*. 2018;6(6):e13654.
- 704 27. Fasth AL, Hoyer JR, and Seiler MW. Extratubular Tamm-Horsfall protein deposits  
705 induced by ureteral obstruction in mice. *Clin Immunol Immunopathol*. 1988;47(1):47-  
706 61.
- 707 28. Sperandio M, Pickard J, Unnikrishnan S, Acton ST, and Ley K. Analysis of leukocyte  
708 rolling in vivo and in vitro. *Methods Enzymol*. 2006;416:346-71.
- 709 29. Kunkel EJ, and Ley K. Distinct phenotype of E-selectin-deficient mice. E-selectin is  
710 required for slow leukocyte rolling in vivo. *Circ Res*. 1996;79(6):1196-204.
- 711 30. Micanovic R, LaFavers K, Garimella PS, Wu XR, and El-Achkar TM. Uromodulin  
712 (Tamm-Horsfall protein): guardian of urinary and systemic homeostasis. *Nephrol Dial*  
713 *Transplant*. 2019.
- 714 31. Saemann MD, Weichhart T, Zeyda M, Staffler G, Schunn M, Stuhlmeier KM, et al.  
715 Tamm-Horsfall glycoprotein links innate immune cell activation with adaptive  
716 immunity via a Toll-like receptor-4-dependent mechanism. *J Clin Invest*.  
717 2005;115(2):468-75.
- 718 32. Nussbaum C, Gloning A, Pruenster M, Frommhold D, Bierschenk S, Genzel-  
719 Boroviczeny O, et al. Neutrophil and endothelial adhesive function during human fetal  
720 ontogeny. *J Leukoc Biol*. 2013;93(2):175-84.
- 721 33. Dayang EZ, Plantinga J, Ter Ellen B, van Meurs M, Molema G, and Moser J.  
722 Identification of LPS-Activated Endothelial Subpopulations With Distinct  
723 Inflammatory Phenotypes and Regulatory Signaling Mechanisms. *Front Immunol*.  
724 2019;10:1169.

- 725 34. Pruenster M, Kurz AR, Chung KJ, Cao-Ehlker X, Bieber S, Nussbaum CF, et al.  
726 Extracellular MRP8/14 is a regulator of beta2 integrin-dependent neutrophil slow  
727 rolling and adhesion. *Nat Commun.* 2015;6:6915.
- 728 35. Hogg N, Patzak I, and Willenbrock F. The insider's guide to leukocyte integrin  
729 signalling and function. *Nat Rev Immunol.* 2011;11(6):416-26.
- 730 36. Su SJ, Chang KL, Lin TM, Huang YH, and Yeh TM. Uromodulin and Tamm-Horsfall  
731 protein induce human monocytes to secrete TNF and express tissue factor. *J Immunol.*  
732 1997;158(7):3449-56.
- 733 37. Popper B, Rammer MT, Gasparitsch M, Singer T, Keller U, Doring Y, et al. Neonatal  
734 obstructive nephropathy induces necroptosis and necroinflammation. *Sci Rep.*  
735 2019;9(1):18600.
- 736 38. Lange-Sperandio B, Schimpfen K, Rodenbeck B, Chavakis T, Bierhaus A, Nawroth  
737 P, et al. Distinct roles of Mac-1 and its counter-receptors in neonatal obstructive  
738 nephropathy. *Kidney Int.* 2006;69(1):81-8.
- 739 39. Schmidt S, Moser M, and Sperandio M. The molecular basis of leukocyte recruitment  
740 and its deficiencies. *Mol Immunol.* 2013;55(1):49-58.
- 741 40. Horton JK, Davies M, Topley N, Thomas D, and Williams JD. Activation of the  
742 inflammatory response of neutrophils by Tamm-Horsfall glycoprotein. *Kidney Int.*  
743 1990;37(2):717-26.
- 744 41. Thomas DB, Davies M, Peters JR, and Williams JD. Tamm Horsfall protein binds to a  
745 single class of carbohydrate specific receptors on human neutrophils. *Kidney Int.*  
746 1993;44(2):423-9.
- 747 42. Siao SC, Li KJ, Hsieh SC, Wu CH, Lu MC, Tsai CY, et al. Tamm-Horsfall  
748 glycoprotein enhances PMN phagocytosis by binding to cell surface-expressed  
749 lactoferrin and cathepsin G that activates MAP kinase pathway. *Molecules.*  
750 2011;16(3):2119-34.
- 751 43. Kreft B, Jabs WJ, Laskay T, Klinger M, Solbach W, Kumar S, et al. Polarized  
752 expression of Tamm-Horsfall protein by renal tubular epithelial cells activates human  
753 granulocytes. *Infect Immun.* 2002;70(5):2650-6.
- 754 44. Darisipudi MN, Thomasova D, Mulay SR, Brech D, Noessner E, Liapis H, et al.  
755 Uromodulin triggers IL-1beta-dependent innate immunity via the NLRP3  
756 inflammasome. *J Am Soc Nephrol.* 2012;23(11):1783-9.
- 757 45. Schmid M, Prajczek S, Gruber LN, Bertocchi C, Gandini R, Pfaller W, et al.  
758 Uromodulin facilitates neutrophil migration across renal epithelial monolayers. *Cell*  
759 *Physiol Biochem.* 2010;26(3):311-8.
- 760 46. El-Achkar TM, McCracken R, Rauchman M, Heitmeier MR, Al-Aly Z, Dagher PC, et al.  
761 Tamm-Horsfall protein-deficient thick ascending limbs promote injury to  
762 neighboring S3 segments in an MIP-2-dependent mechanism. *Am J Physiol Renal*  
763 *Physiol.* 2011;300(4):F999-1007.
- 764 47. El-Achkar TM, McCracken R, Liu Y, Heitmeier MR, Bourgeois S, Ryerse J, et al.  
765 Tamm-Horsfall protein translocates to the basolateral domain of thick ascending  
766 limbs, interstitium, and circulation during recovery from acute kidney injury. *Am J*  
767 *Physiol Renal Physiol.* 2013;304(8):F1066-75.
- 768 48. El-Achkar TM, and Wu XR. Uromodulin in kidney injury: an instigator, bystander, or  
769 protector? *Am J Kidney Dis.* 2012;59(3):452-61.
- 770 49. Micanovic R, Chitteti BR, Dagher PC, Srour EF, Khan S, Hato T, et al. Tamm-  
771 Horsfall Protein Regulates Granulopoiesis and Systemic Neutrophil Homeostasis. *J*  
772 *Am Soc Nephrol.* 2015;26(9):2172-82.
- 773 50. Huang ZQ, Kirk KA, Connelly KG, and Sanders PW. Bence Jones proteins bind to a  
774 common peptide segment of Tamm-Horsfall glycoprotein to promote heterotypic  
775 aggregation. *J Clin Invest.* 1993;92(6):2975-83.

- 776 51. Hecquet CM, Ahmmed GU, and Malik AB. TRPM2 channel regulates endothelial  
777 barrier function. *Adv Exp Med Biol.* 2010;661:155-67.
- 778 52. Di A, Kiya T, Gong H, Gao X, and Malik AB. Role of the phagosomal redox-sensitive  
779 TRP channel TRPM2 in regulating bactericidal activity of macrophages. *J Cell Sci.*  
780 2017;130(4):735-44.
- 781 53. Immler R, Simon SI, and Sperandio M. Calcium signalling and related ion channels in  
782 neutrophil recruitment and function. *Eur J Clin Invest.* 2018;48 Suppl 2:e12964.
- 783 54. Gasparitsch M, Schieber A, Schaubeck T, Keller U, Cattaruzza M, and Lange-  
784 Sperandio B. Tyrphostin AG490 reduces inflammation and fibrosis in neonatal  
785 obstructive nephropathy. *PLoS One.* 2019;14(12):e0226675.
- 786 55. Scherberich JE, Gruber R, Nockher WA, Christensen EI, Schmitt H, Herbst V, et al.  
787 Serum uromodulin-a marker of kidney function and renal parenchymal integrity.  
788 *Nephrol Dial Transplant.* 2018;33(2):284-95.
- 789 56. Schindelin J, Arganda-Carreras I, Frise E, Kaynig V, Longair M, Pietzsch T, et al.  
790 Fiji: an open-source platform for biological-image analysis. *Nat Methods.*  
791 2012;9(7):676-82.
- 792 57. Praetner M, Zuchtriegel G, Holzer M, Uhl B, Schaubacher J, Mittmann L, et al.  
793 Plasminogen Activator Inhibitor-1 Promotes Neutrophil Infiltration and Tissue Injury  
794 on Ischemia-Reperfusion. *Arterioscler Thromb Vasc Biol.* 2018;38(4):829-42.
- 795 58. Jaffe EA, Nachman RL, Becker CG, and Minick CR. Culture of human endothelial  
796 cells derived from umbilical veins. Identification by morphologic and immunologic  
797 criteria. *J Clin Invest.* 1973;52(11):2745-56.
- 798 59. Uhl B, Vadlau Y, Zuchtriegel G, Nekolla K, Sharaf K, Gaertner F, et al. Aged  
799 neutrophils contribute to the first line of defense in the acute inflammatory response.  
800 *Blood.* 2016;128(19):2327-37.
- 801 60. Gasparitsch M, Arndt AK, Pawlitschek F, Oberle S, Keller U, Kasper M, et al. RAGE-  
802 mediated interstitial fibrosis in neonatal obstructive nephropathy is independent of  
803 NF-kappaB activation. *Kidney Int.* 2013;84(5):911-9.
- 804 61. Vielhauer V, Allam R, Lindenmeyer MT, Cohen CD, Draganovici D, Mandelbaum J,  
805 et al. Efficient renal recruitment of macrophages and T cells in mice lacking the duffy  
806 antigen/receptor for chemokines. *Am J Pathol.* 2009;175(1):119-31.  
807

## Figure 1

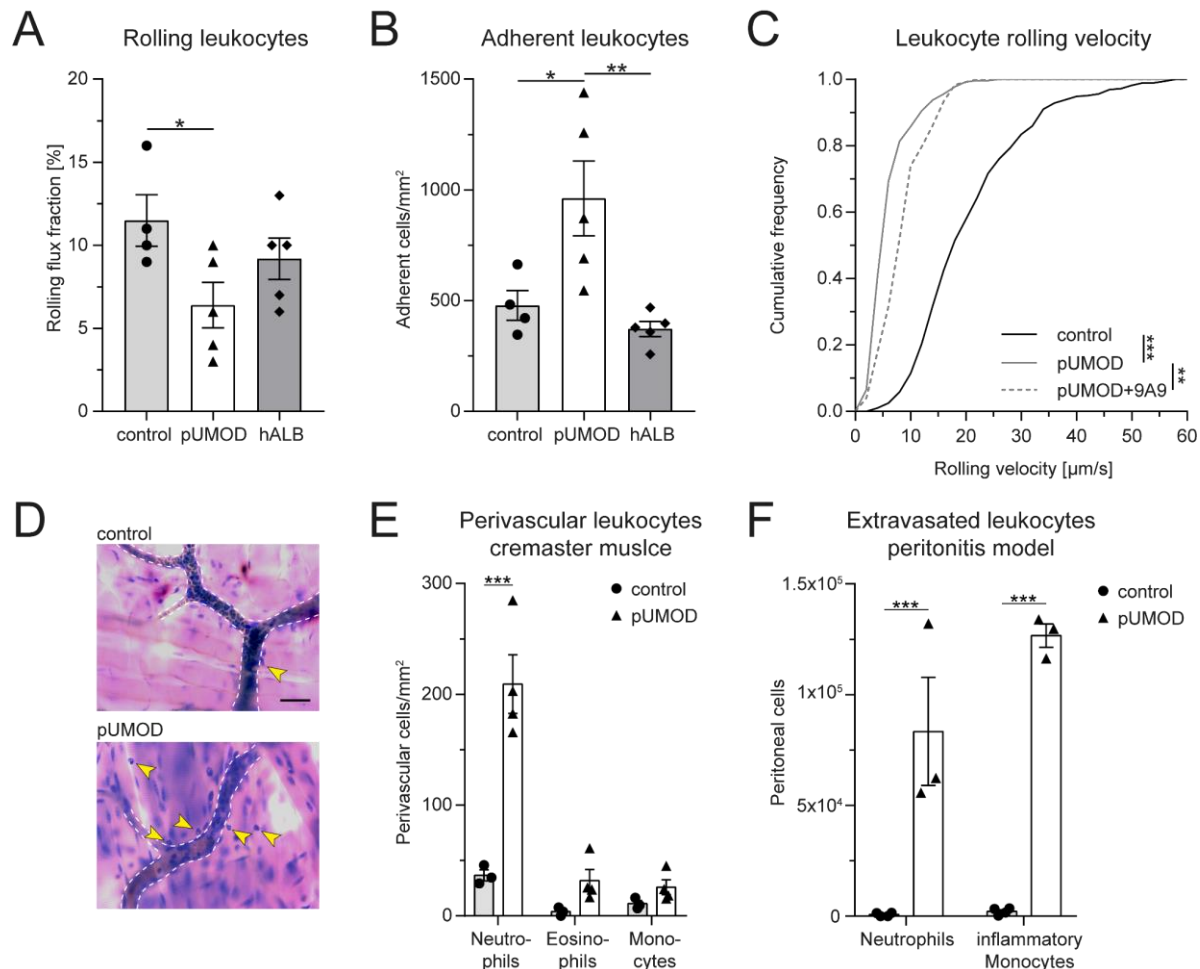

808

809 **Figure 1 pUMOD induces leukocyte recruitment in murine microvascular inflammation**  
 810 **models.** pUMOD, normal saline (control) or human albumin (hAlb) were injected i.s. two hours  
 811 prior to intravital microscopy of postcapillary venules of the mouse cremaster muscle. (A)  
 812 Leukocyte rolling flux fraction and (B) number of adherent leukocytes in 17 (control), 23  
 813 (pUMOD) and 18 (hALB) venules of n=4-5 mice per group were assessed in postcapillary  
 814 venules of mouse cremaster muscles. (C) Leukocyte rolling velocities of n=392 (control), 274  
 815 (pUMOD) and 123 (pUMOD+9A9) cells in 4-5 mice per group were analyzed. pUMOD  
 816 administration reduced rolling flux fraction and rolling velocity of leukocytes and increased  
 817 the number of adherent cells compared to control conditions (one-way ANOVA, Tukey's  
 818 multiple comparison). (D) Giemsa staining (representative micrographs of n=3-4 mice per  
 819 group) of cremasteric tissue were carried out. Arrow bars indicate perivascular leukocytes  
 820 (scale bar=30µm). (E) Number of perivascular neutrophils, eosinophils and monocytes were  
 821 calculated in 37 (control) and 54 (pUMOD) perivascular regions of n=3-4 mice per group (two-  
 822 way repeated measurements ANOVA, Sidak's multiple comparison). (F) pUMOD and normal  
 823 saline (control) was injected i.p. and numbers of recruited neutrophils and inflammatory  
 824 monocytes into the peritoneum was assessed 6 hours later (n=3-4 mice per group, two-way  
 825 ANOVA, Sidak's multiple comparison). \*: p≤0.05, \*\*: p≤0.01, \*\*\*: p≤0.005, data is presented  
 826 as mean±SEM, cumulative frequency or representative images.

## Figure 2

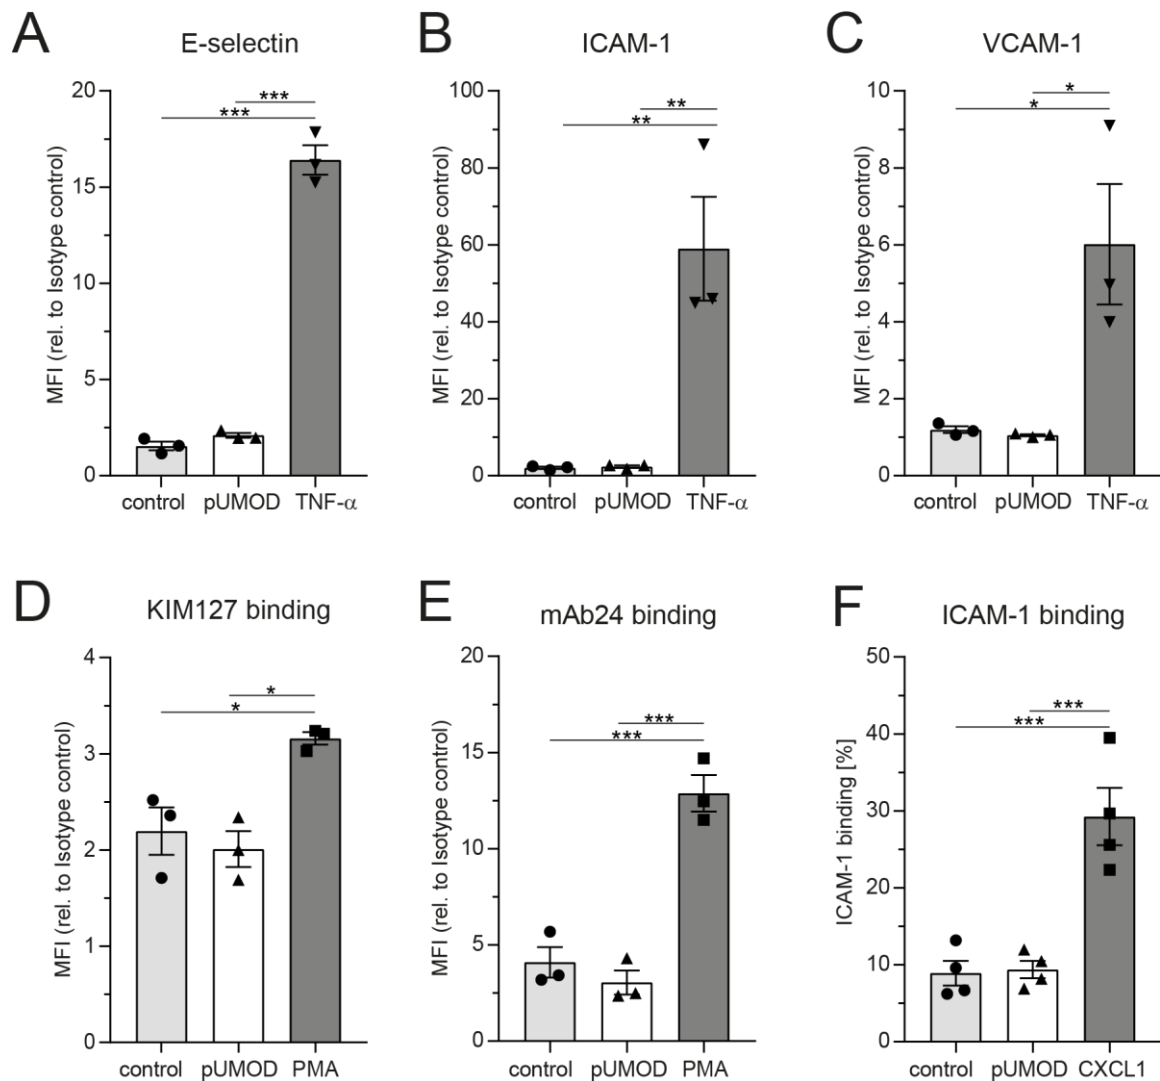

827

828 **Figure 2 pUMOD does not directly induce adhesion molecule expression on endothelial cells**  
829 **or  $\beta 2$  integrin activation on neutrophils.** HUVEC monolayers were stimulated with pUMOD,  
830 TNF- $\alpha$  or vehicle control and surface expression of (A) E-selectin, (B) ICAM-1 and (C) VCAM-1  
831 was determined (n=3 independent experiments, one-way ANOVA, Tukey's multiple  
832 comparison, MFI=Mean fluorescence intensity). Isolated human neutrophils were stimulated  
833 with pUMOD, PMA or vehicle control and (D) LFA-1 intermediate activation and (E) LFA-1  
834 intermediate and fully activation state was analyzed (n=3 independent experiments, one-way  
835 ANOVA, Tukey's multiple comparison). (F) Bone marrow derived murine neutrophils were  
836 stimulated with pUMOD, CXCL1 or vehicle control and binding capacity of soluble ICAM-1 to  
837 the cells was quantified (n= 4 mice per group, one-way ANOVA, Tukey's multiple comparison).  
838 \*:  $p \leq 0.05$ , \*\*:  $p \leq 0.01$ , \*\*\*:  $p \leq 0.005$ , data is presented as mean  $\pm$  SEM.

## Figure 3

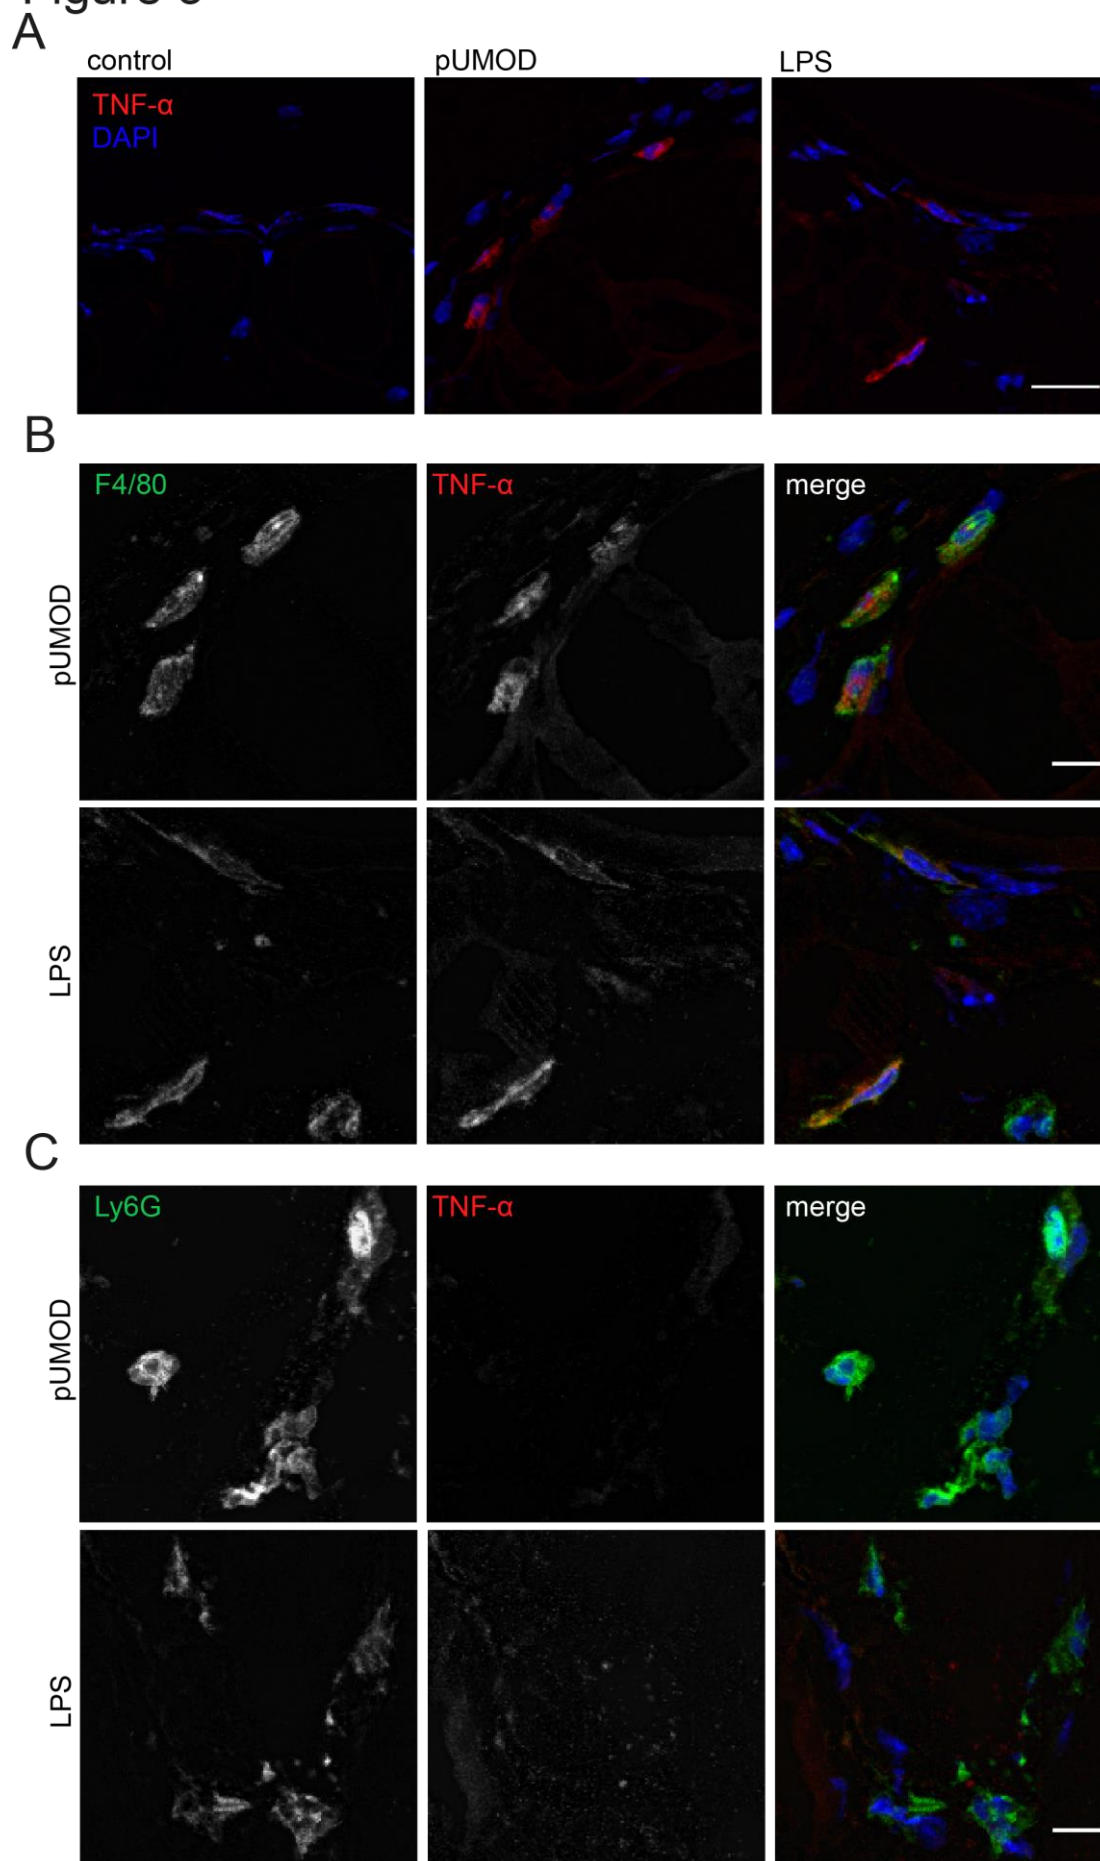

840 **Figure 3 pUMOD induces TNF- $\alpha$  expression of F4/80 positive macrophages in the cremaster**  
841 **muscle *in vivo*.** Cryo sections of normal saline (control), LPS and pUMOD stimulated cremaster  
842 muscles of WT mice were stained for (A) TNF- $\alpha$  expression (representative micrographs of n=3  
843 mice per group, scale bar=20 $\mu$ m; red: TNF- $\alpha$ , blue: DAPI), (B) macrophages (F4/80)  
844 (representative micrographs of n=3 mice per group, scale bar=10 $\mu$ m, green: F4/80, red: TNF-  
845  $\alpha$ , blue: DAPI) and (C) neutrophils (Ly6G) (representative micrographs of n=3 mice per group,  
846 scale bar=10 $\mu$ m, green: Ly6G, red: TNF- $\alpha$ , blue: DAPI). Data is presented as representative  
847 images.

## Figure 4

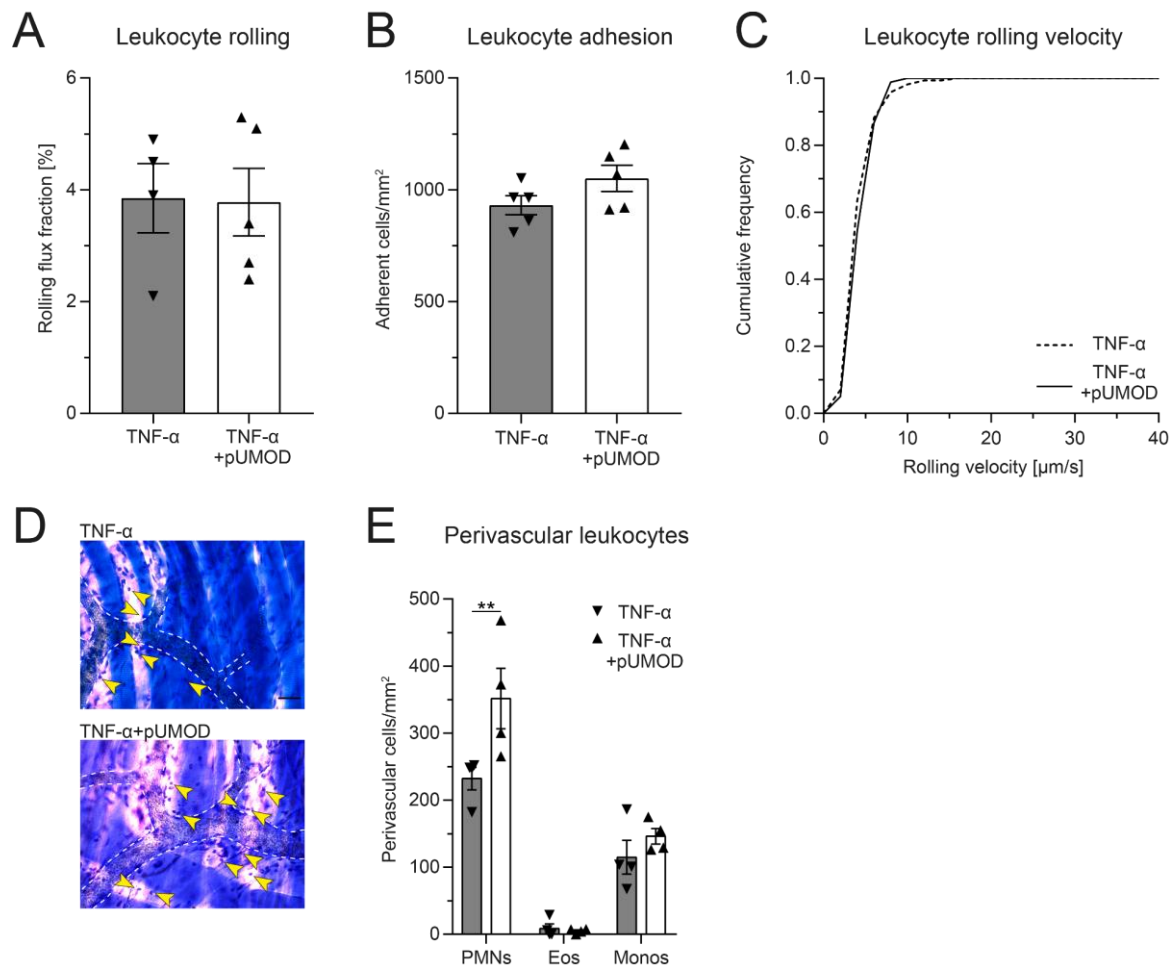

848

849 **Figure 4 Intrascrotal pUMOD application potentiates the effects of TNF- $\alpha$  in the acute**  
 850 **inflammation model of the mouse cremaster muscle *in vivo*.** WT mice were injected i.s. with  
 851 TNF- $\alpha$  or a combination of TNF- $\alpha$  and pUMOD. Two hours after stimulation, intravital  
 852 microscopy of postcapillary venules of the cremaster muscle was performed and (A) rolling  
 853 flux fraction and (B) number of adherent leukocytes was analyzed in 34 (TNF- $\alpha$ ) and 35 (TNF-  
 854  $\alpha$ +pUMOD) venules of n=5 mice per group. (C) Leukocyte rolling velocity was determined in  
 855 n=170 (TNF- $\alpha$ ) and 180 (TNF- $\alpha$ +pUMOD) cells of 5 mice per group. Concomitant application of  
 856 TNF- $\alpha$  and pUMOD did not modify rolling flux fraction, leukocyte adhesion or rolling velocities  
 857 compared to TNF- $\alpha$  administration (unpaired students t-test). (D) Cremaster muscles were  
 858 stained with Giemsa (representative micrographs of n=4 mice per group. Arrow bars indicate  
 859 perivascular leukocytes, (scale bar=30 $\mu$ m). (E) Number of perivascular neutrophils (PMNs),  
 860 eosinophils (Eos) and monocytes (Monos) was analyzed in 28 perivascular regions of n=4 mice  
 861 per group. Concomitant application of TNF- $\alpha$  and pUMOD increased the number of  
 862 perivascular neutrophils compared to TNF- $\alpha$  administration (two-way repeated  
 863 measurements ANOVA, Sidak's multiple comparison). \*\*: p $\leq$ 0.01, data is presented as  
 864 mean $\pm$ SEM, cumulative frequency or representative images.



## Figure 5

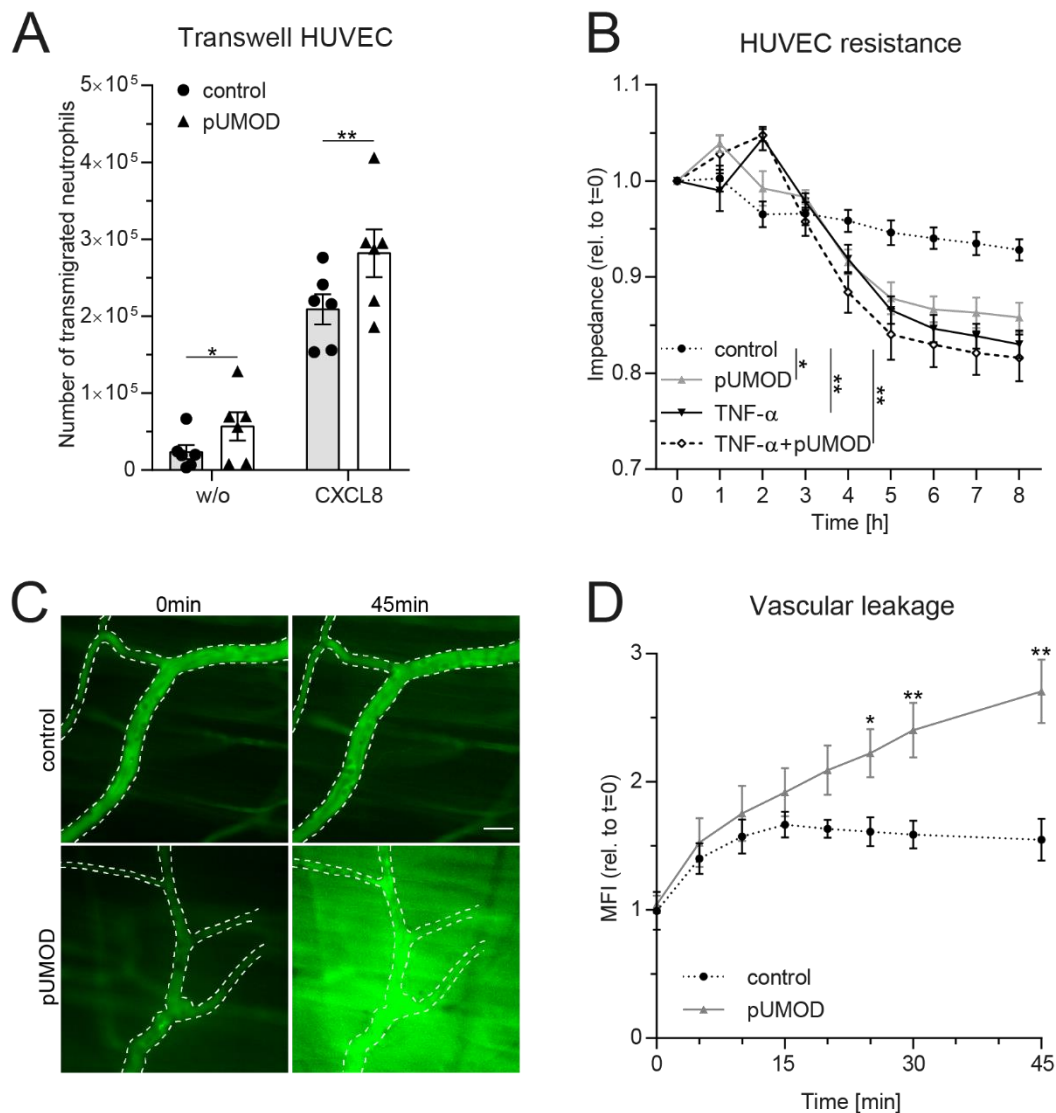

865

866 **Figure 5 pUMOD facilitates neutrophil transmigration across a HUVEC monolayer and**  
 867 **increases vascular permeability *in vitro* and *in vivo*.** (A) Number of human neutrophils  
 868 transmigrating along a CXCL8 or HBSS (w/o) gradient through a HUVEC monolayer pre-  
 869 stimulated with pUMOD or vehicle control (control). (B) Electrical impedance of HUVEC  
 870 monolayers were measured over time in the presence of pUMOD, TNF- $\alpha$ , a combination of  
 871 pUMOD+TNF- $\alpha$  or vehicle control (control) (n=5 independent experiments, repeated one-way  
 872 ANOVAs, Tukey's multiple comparisons). (C) Intravital microscopy of WT mice pretreated i.s.  
 873 with pUMOD or normal saline (control). Through systemic injection of FITC-dextran, vascular  
 874 leakage was assessed over time (representative micrographs of n=6 mice per group, scale  
 875 bar=30 $\mu$ m) and (D) changes in mean fluorescence intensity (MFI) were quantified (n=6 mice  
 876 per group, unpaired student's t-test). \*: p $\leq$ 0.05, \*\*: p $\leq$ 0.01, data is presented as mean $\pm$ SEM.

## Figure 6

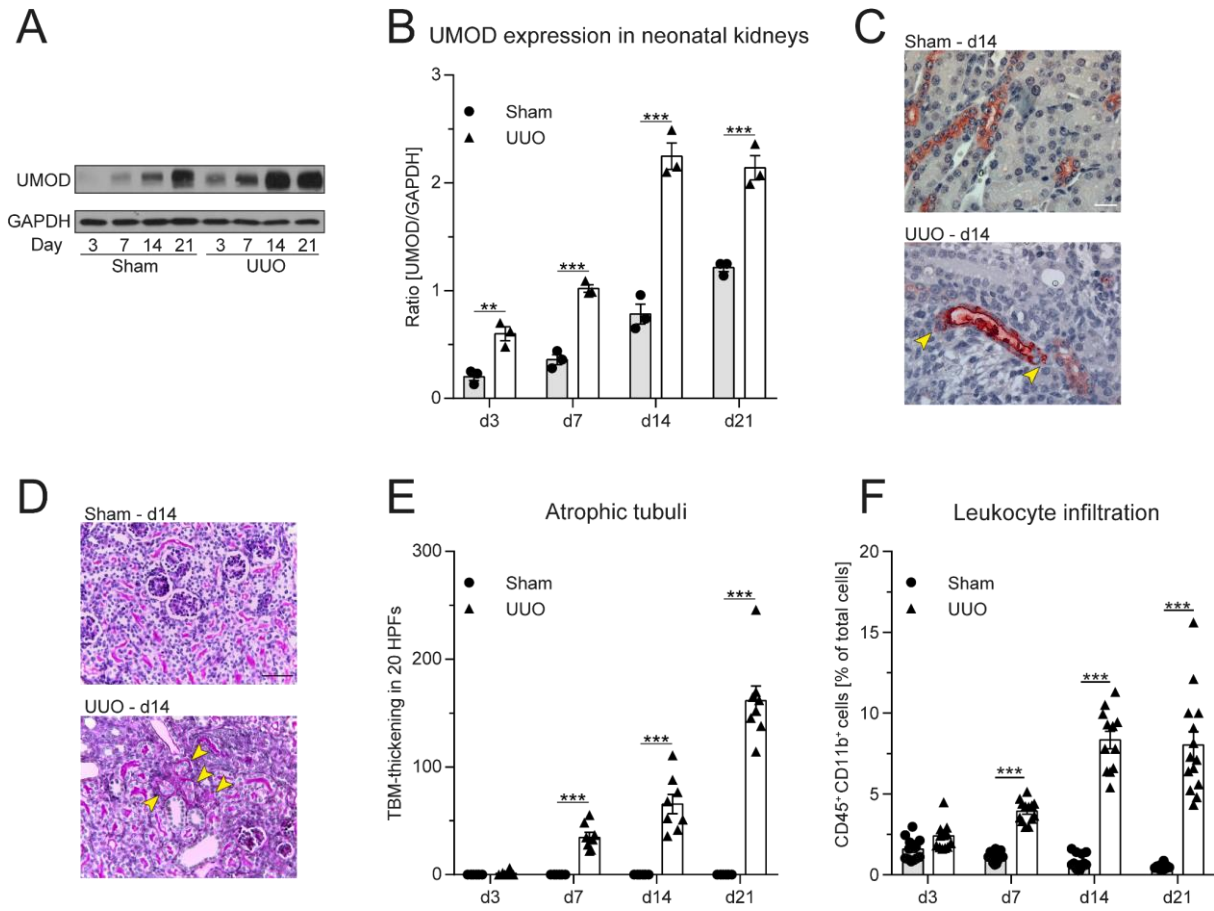

877

878 **Figure 6 Neonatal obstructive nephropathy induces intra- and extratubular UMOD**  
 879 **accumulation accompanied by tubular atrophy and leukocyte infiltration. (A)** Changes in  
 880 total UMOD protein levels over time in sham and UUU operated neonatal kidneys were  
 881 analyzed (representative blot) and **(B)** quantified (n=3 independent experiments, two-way  
 882 repeated measurements ANOVA, Sidak's multiple comparison). **(C)** Intra- and extratubular  
 883 (yellow arrows) UMOD accumulation (scale bar=20µm) and **(D)** PAS staining in sham and UUU  
 884 operated neonatal kidneys was analyzed (representative micrographs, scale bar=200µm;  
 885 arrow bars indicate atrophic tubuli). **(E)** Tubular atrophy (n=8 mice per group, two-way  
 886 repeated measurements ANOVA, Sidak's multiple comparison; TBM: tubular basement  
 887 membrane; HPF: high-power field) and **(F)** myeloid cell infiltration was assessed in sham and  
 888 UUU operated neonatal kidneys (n=12-16 mice per group, two-way ANOVA, Sidak's multiple  
 889 comparison). \*\*: p<0.01, \*\*\*: p<0.005, data is presented as mean±SEM or representative  
 890 images.

## Figure 7

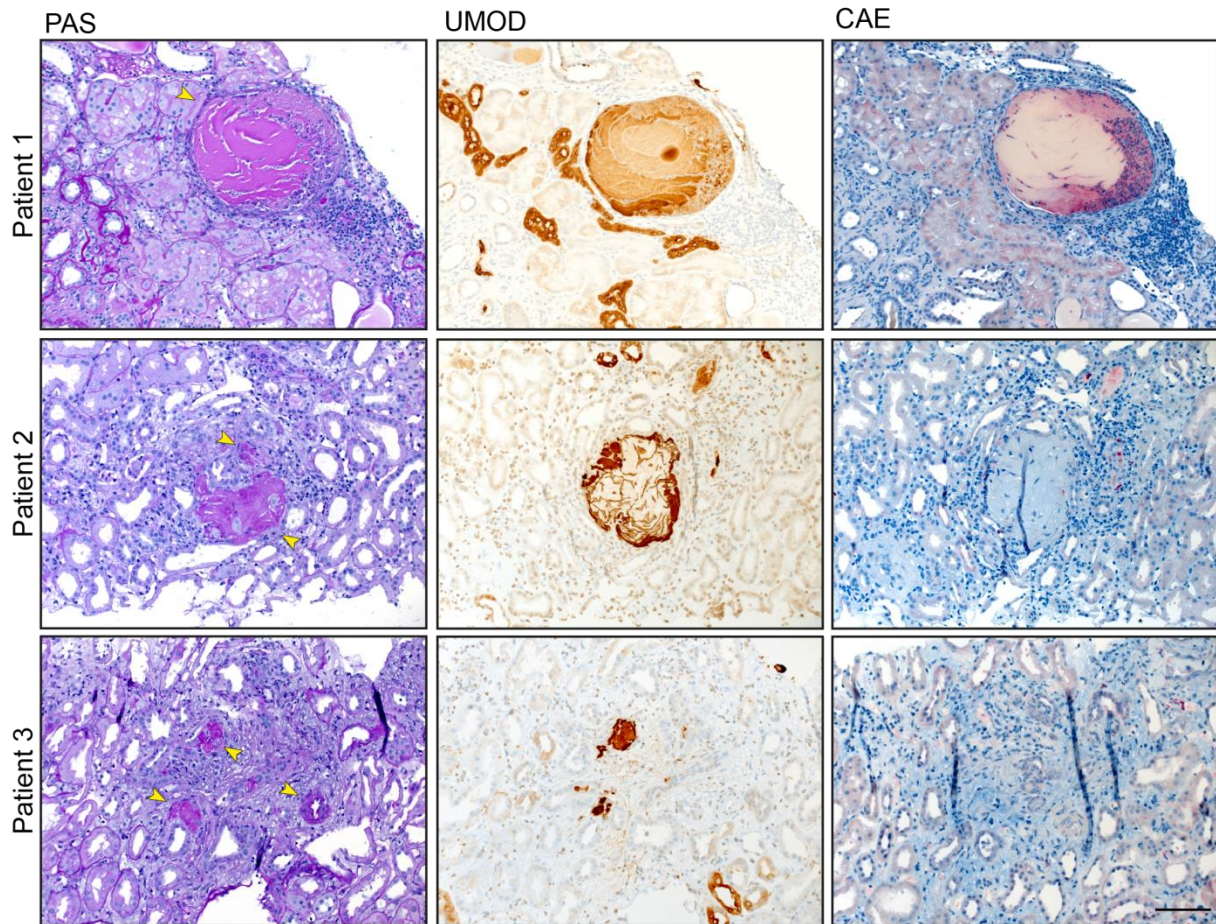

891

892 **Figure 7 UMOD casts colocalize with neutrophil infiltrates.** We detected UMOD casts in the  
893 kidneys of three patients suffering from monoclonal gammopathy with renal significance, IgA  
894 nephropathy, and interstitial nephritis with arterial hypertension, respectively. PAS and  
895 antibody staining display UMOD localization (arrows). Neutrophil infiltrates, stained with anti  
896 CEA antibody, were found in close proximity to UMOD casts (scale bar=100 $\mu$ m)
